1 The Crohn's disease-associated *Escherichia coli* strain LF82 rely on SOS and stringent  
2 responses to survive, multiply and tolerate antibiotics within macrophages.

3

4 Gaëlle Demarre <sup>1,2</sup>, Victoria Prudent <sup>1</sup>, Hanna Schenk <sup>3,6</sup>, Emilie Rousseau <sup>1</sup>, Marie-Agnes  
5 Bringer <sup>4,5</sup>, Nicolas Barnich <sup>5</sup>, Guy Tran Van Nhieu <sup>1</sup>, Sylvie Rimsky <sup>1</sup>, Silvia De Monte <sup>3,6</sup>  
6 and Olivier Espéli <sup>1,\*</sup>.

7

8 Affiliations

9 <sup>1</sup> CIRB – Collège de France, CNRS-UMR724, INSERM U1050, PSL Research University, 11  
10 place Marcelin Berthelot 75005 Paris, France.

11 <sup>2</sup> Inovarion, Paris, France

12 <sup>3</sup> Department of Evolutionary Theory, Max Planck Institute for Evolutionary  
13 Biology, Plön, Germany

14 <sup>4</sup> Centre des Sciences du Goût et de l'Alimentation, AgroSup Dijon, CNRS, INRA,  
15 Université Bourgogne Franche-Comté, F-21000 Dijon, France

16 <sup>5</sup> Microbes, Intestin, Inflammation et Susceptibilité de l'Hôte. UMR Inserm/ Université  
17 d'Auvergne U1071, USC INRA 2018

18 <sup>6</sup> Institut de Biologie de l'Ecole Normale Supérieure, Département de Biologie, Ecole  
19 Normale Supérieure, CNRS, INSERM, PSL Research University, Paris, France

20

21

22 \* for correspondence: [olivier.espeli@college-de-france.fr](mailto:olivier.espeli@college-de-france.fr)

23

24

25

26 **Abstract**

27 Adherent Invasive *Escherichia coli* (AIEC) strains recovered from Crohn's disease lesions  
28 survive and multiply within macrophages. A reference strain for this pathovar, AIEC  
29 LF82, forms microcolonies within phagolysosomes, an environment that prevents  
30 commensal *E. coli* multiplication. Little is known about the LF82 intracellular growth  
31 status, and signals leading to macrophage intra-vacuolar multiplication. We used single-  
32 cell analysis, genetic dissection and mathematical models to monitor the growth status  
33 and cell cycle regulation of intracellular LF82. We found that within macrophages,  
34 bacteria may replicate or undergo non-growing phenotypic switches. This switch results  
35 from stringent response firing immediately after uptake by macrophages or at later  
36 stages, following genotoxic damage and SOS induction during intracellular replication.  
37 Importantly, non-growers resist treatment with various antibiotics. Thus, intracellular  
38 challenges induce AIEC LF82 phenotypic heterogeneity and non-growing bacteria that  
39 could provide a reservoir for antibiotic-tolerant bacteria responsible for relapsing  
40 infections.

41

## 42 **Introduction**

43 Adherent Invasive *Escherichia coli* (AIEC) strains recovered from Crohn's disease (CD)  
44 lesions are able to adhere to and invade cultured intestinal epithelial cells and to survive  
45 and multiply within macrophages (Darfeuille-Michaud *et al*, 1998; Glasser *et al*, 2001).  
46 Attention around the potential role of AIEC in the pathophysiology of CD is growing  
47 (Elhenawy *et al*, 2018); however much remains to be learned about the host-pathogen  
48 interactions that govern AIEC infection biology. The diversity of virulence factors  
49 displayed by multiple AIEC strains suggests that members of this pathovar have evolved  
50 different strategies to colonize their hosts (Tawfik *et al*, 2014). AIEC ability to persist,  
51 and in some cases replicate within macrophages is particularly intriguing. Previous  
52 work performed with murine macrophage cell lines has revealed that the prototype  
53 AIEC strain LF82, multiplies in a vacuole presenting the characteristics of a mature  
54 phagolysosome (Bringer *et al*, 2006; Lapaquette *et al*, 2012). In such an environment,  
55 AIEC should encounter acidic, oxidative, genotoxic and proteic stresses. Screening of  
56 genes involved in LF82 fitness within macrophage has revealed that HtrA, DsbA, or Fis  
57 proteins are required for optimum fitness, (Bringer *et al.*, 2005; Bringer *et al.*, 2007;  
58 Miquel *et al.*, 2010). These observations confirmed that LF82 encounter stresses in the  
59 phagolysosomes. The impact of these stresses on the survival and growth of LF82 inside  
60 phagolysosomes has not yet been investigated.

61 Studies on the bacterial cell cycle of few model organisms under well-controlled  
62 laboratory conditions have revealed that to achieve accurate transmission of the genetic  
63 information and optimal growth of the population, molecular processes must be  
64 coordinated. (for reviews see Hajduk *et al.*, 2016; Haeusser & Levin, 2008). When  
65 growth conditions deteriorate, the cell cycle can be modified slightly, as in the case of  
66 cell filamentation when genotoxic stress induces the SOS response, or more drastically  
67 when sporulation is induced by nutrient deprivation (Jonas, 2014). Such cell cycle  
68 alterations affect the entire population. However, under unperturbed conditions, a  
69 subset of the population also appears to present a significantly reduced growth rate that  
70 allows tolerance to antibiotic treatments. This small portion of the population, typically  
71 1/10000 bacteria, is known as persisters (Wood *et al.*, 2013; Lewis, 2010; Bigger, 1944).  
72 Persisters have been detected for a number of bacteria. They can be found  
73 spontaneously in normally growing or stationary phase populations, or they are induced  
74 by exogeneous stresses or mutations. Significant increase of the proportion of *S.*

75 *typhimurium* persisters has been observed when these bacteria invade macrophages  
76 (Helaine *et al.*, 2014). Using a fluorescent reporter, it has been demonstrated that these  
77 persisters were not multiplying prior to antibiotic addition. Recently, the same tool also  
78 revealed the presence of non-growing mycobacteria inside macrophages (Mouton *et al.*,  
79 2016). Several mediators of persistence have been identified, with toxin-antitoxin  
80 modules emerging as key players and the reduction of metabolic activities as the main  
81 driver of persistence (Rycroft *et al.*, 2018; Dörr *et al.*, 2009; Shan *et al.*, 2017; Balaban *et*  
82 *al.*, 2004; Harms *et al.*, 2017; Amato *et al.*, 2014). Persisters are increasingly viewed as a  
83 major cause of the recurrence of chronic infectious disease and could be an important  
84 factor in the emergence of antibiotic resistance (Verstraeten *et al.*, 2016). In addition to  
85 persisters, bacterial tolerance to antibiotic treatments has been observed. In contrast to  
86 persisters, tolerance concerns the entire population. Tolerance corresponds to a weaker  
87 ability of antibiotics to kill slow growing compared to fast growing bacteria. Tolerant  
88 bacteria emerge, for example, in the presence of a nutritional limitation. The viability of  
89 tolerant bacteria is impacted by the concentration and length of the antibiotic challenge  
90 (Kim & Wood, 2017). Tolerant cells have some aspect of active metabolism, and their  
91 frequency in the population changes when bacterial environmental sensing is altered  
92 (Amato & Brynildsen, 2015; Bernier *et al.*, 2013; Radzikowski *et al.*, 2016). Persistence is  
93 often viewed as the result of a phenotypic switch ensuring long-term adaptation to  
94 variable environments, however the origin of persistence and tolerance *in vivo* remain  
95 unclear, and their distinction in the context of a host- pathogen interaction is difficult  
96 (Kim & Wood, 2017).

97  
98 In the present work, we analyzed growth characteristics of the prototype AIEC strain  
99 LF82 in THP1 monocyte-derived macrophages. We observed that stresses within  
100 macrophages induce a profound bacterial response that leads to the formation of non-  
101 growing and antibiotic-tolerant LF82 bacteria at a high rate through the successive  
102 induction of stringent and SOS responses. A portion of non-growing LF82 produced  
103 within macrophages is tolerant to antibiotics and presents a survival advantage. Our  
104 work revealed that internalization within phagolysosomes curbs bacterial  
105 multiplication, and frequent escape from the replicative cycle toward non-growing  
106 state(s) is a way to improve long-term survival in the host.

107



## 108 **Results**

109

### 110 **Inside macrophages, LF82 population size increases despite extensive death.**

111 We used THP1 monocyte-derived into macrophages to monitor the population size of  
112 LF82 bacteria over a 24 h period post infection (P.I.) (Figure 1A). Colony-forming units  
113 (CFU) measurements revealed that the LF82 population exponentially increased for 10-  
114 14 hours ( $\tau = 0.15 \text{ h}^{-1}$ , 0.21 doubling / h) after a long lag. The population reached a  
115 maximum at 18-20 h of approximately 5-fold the value at 1 h; the number of LF82 then  
116 slightly decreased (reaching 3 -fold) at 24 h. In this environment LF82 might  
117 simultaneously encounter acidic pH, oxidative and genotoxic stresses, toxic molecules  
118 such as cathepsins and a lack of important nutrients. Surprisingly, the tolerance level of  
119 LF82 to any individual stress did not differ from a K12-C600 *E. coli* in *in vitro* conditions  
120 (Supplementary Figure S1A). Using direct ex vivo Live and Dead labeling, it has been  
121 previously proposed that 80% of LF82 present at 24h within macrophages were alive  
122 (Lapaquette *et al.*, 2012). We observed that this method slightly underestimates dead  
123 bacteria inside macrophages because of a weak propidium iodide (PI) labeling  
124 (Supplementary Figure S2A). Live and dead assay performed immediately after  
125 macrophage lysis revealed a nearly constant proportion of dead LF82 in the population  
126 (20 - 30%) at 1 h, 12 h, 18h and 24 h post-infection (Figure 1A). To estimate the speed of  
127 dead bacteria disappearing in macrophages, we observed the elimination of heat-killed  
128 bacteria by THP1 macrophages. Dead LF82 disappeared exponentially with a decay rate  
129 of  $0.6 \text{ h}^{-1}$  and a half-life of 1.4 h (Supplementary Figure S2B); therefore dead LF82  
130 observed at 12h, 18h or 24 h did not correspond to the accumulation over infection  
131 period but rather to the bacteria killed in the last 3 hours before observations. This  
132 finding led to consider that LF82 must be under stress attack by macrophages at all  
133 times during infection.

134

### 135 **LF82 is under attack by macrophages.**

136 Using RT-qPCR, we measured the expression of genes induced by the acid (*asr*, *ydeO* and  
137 *frc*), oxidative (*soxS* and *ykgB*), and SOS (*sula*) responses, and the responses to  
138 membrane alteration (*pspB*), the lack of  $\text{Mg}^{2+}$  (*mgrB*), the lack of phosphate (*phoB*),  
139 general efflux pump (*emrK*) and the *gltT* tRNA gene that is repressed by the stringent  
140 response (Figure 1B). Every response pathway was induced inside the macrophage. The

141 induction of acid and the oxidative responses was already high at 1 h P.I., while the SOS  
142 response, the response to membrane alterations and to the lack of Mg<sup>2+</sup>, were peaking  
143 at 6 h P.I.. The expression of the *gltT* tRNA was strongly repressed at 1 h P.I. indicating  
144 that stringent response is on early in the infection. The induction of most pathways  
145 decreased at 24 h.

146

#### 147 **Environmental stresses influence LF82 survival.**

148 To test the impact of stress responses on the ability of LF82 to colonize macrophage, we  
149 constructed deletion mutants of several key regulators of *E. coli* stress pathways and  
150 analyzed their survival. Deletion of the acid stress regulators *evgA-evgS*, *phoP* and *ydeO*  
151 significantly impacted the ability of LF82 to survive and multiply within macrophages to  
152 a level comparable to or even below that of a K12-C600 *E. coli* (Figure 1C). Similar  
153 observations were obtained with the *rpoS* (general stress response), *recA* (SOS  
154 response), *soxS* (oxidative stress) and *pspA* and *htrA* (envelope damages) deletion  
155 mutants. The ppGpp0 strain, *relA spoT* deletions, impaired in the stringent response  
156 reporting a lack of nutrients, is the most impacted strain; less than 5% of the initial  
157 population survived a 24 h period within macrophages. These observations confirmed  
158 that LF82 encounter severe stresses in the macrophage environment and that its ability  
159 to repair stress mediated injuries will determine survival.

160

#### 161 **SOS and stringent responses severely impacted LF82 survival**

162 Because of their known potential to influence growth and cell cycle parameters we  
163 explored the stringent and SOS responses in more details. RecA is the main inducer of  
164 the SOS response, which activates nearly 100 genes involved in DNA repair and many  
165 others with unrelated or unknown functions, but it is also a crucial to correct DNA  
166 lesions by homologous recombination and translesion synthesis (Kreuzer, 2013). In  
167 addition to *recA* deletion, we constructed deletions of *sula* (division inhibitor) and a  
168 mutation in *lexA* (*lexAind-*), which blocks SOS induction in MG1655 *E. coli* and reduces  
169 viability in the presence of mitomycin C for LF82 and MG1655 (Supplementary Figure  
170 S3A). We observed that the deletion of each SOS gene significantly decreased the  
171 survival of LF82 within macrophages (Figure 1C). Inside the macrophage, survival of the  
172 ppGpp0 strain was dramatically impacted. However, this mutant also presented a strong  
173 growth defect in liquid culture that complicates interpretation of the macrophage

174 results. To study the impact of the stringent response on LF82 survival and induced  
175 antibiotic tolerance, we constructed deletion mutants that might have partial stringent  
176 response phenotypes; deletion of *dksA*, encoding a protein linking the stringent  
177 response to transcription (Sharma & Chatterji, 2010); and deletion of the polyphosphate  
178 kinase and exopolyphosphatase *ppk* and *ppx* (Rao & Kornberg, 1999). As expected, the  
179 *dksA* and *ppk-ppx* deletions had a much less dramatic effect on LF82 growth and  
180 survival within macrophages than the *relA-spoT* mutant; nevertheless, the *dksA*  
181 mutation significantly impacted the number of live bacteria recovered at 24 h P.I.  
182 (Figure 1C). We investigated the ability of LF82 to survive within macrophages when  
183 both stringent and SOS responses were altered. We chose to combine *dksA* deletion with  
184 *recA* deletion or *lexAind-* mutation. These strains presented a survival defect comparable  
185 to that of the single *dksA* mutant (Figure 1C). These observations demonstrate that  
186 surviving LF82 simultaneously or successively require SOS and stringent responses.

187

### 188 **Inside phagolysosomes individual LF82 were not homogeneously responding to** 189 **stresses.**

190 Imaging revealed great heterogeneity in the number of LF82 bacteria within individual  
191 macrophages. At 18 h or 24 h P.I., many macrophages presented fewer than 5 bacteria,  
192 which was comparable to the amount observed at 1 h P.I. (Figure 2A); however, a  
193 number of macrophages also presented foci containing up to 50 bacteria (Figure 2B).  
194 These observations led us to consider that LF82 were not homogeneously stressed by  
195 macrophages. We used GFP fusion with selected stress response promoters to monitor  
196 variability of these responses among bacteria and among macrophages (Figure 2B). For  
197 all stress responses, heterogeneity in GFP fluorescence for intracellular bacteria was far  
198 larger than for LB cultures (Figure 2 F - G). At 24 h P.I., we found that approximately  
199 30% of the bacteria had poorly responded to oxidative or acid responses (Figure 2E and  
200 2F). Owing the high stability of the GFP protein that we used in this assay, it is unlikely  
201 that this heterogeneity resulted from short pulses of induction separated by long  
202 repression periods. Such a sizeable phenotypic heterogeneity was moreover observed  
203 for bacteria contained in a single macrophage as well as similar Lamp 1 positive  
204 vacuolar environments (Figure 2C). We therefore questioned whether heterogeneity in  
205 stress response might reflect the coexistence of multiple cell cycle regulation  
206 phenotypes.

207

## 208 **Macrophages induce the formation of non-growing LF82**

209 We analyzed heterogeneity in LF82 cell cycle within macrophages by using two  
210 complementary fluorescence assays. First, Fluorescent Dilution (FD) highlights bacteria  
211 that have not divided since the time of infection (Figure 3A and Supplementary Figure  
212 S4A-C).

213 FD shows that at 24 h P.I. LF82 underwent up to 6 divisions, which is still below the  
214 maximum dilution detectable by the assay in our conditions (8 generations in LB,  
215 Supplementary Figure S4B). In good agreement with the CFU, measurement of FD  
216 showed that only 20% of the population has performed more than 1 division at 6 h P.I.  
217 From these observations, we can estimate that the highest generation rate of LF82  
218 within macrophages is  $\approx 0.5$  doubling /h between 6 and 20 h P.I.. Interestingly, FD also  
219 revealed that approximately 4% of the population did not divide or divided fewer than 2  
220 times intracellularly in 24 h (Figure 3A and Supplementary Figure S4B). By contrast  
221 among the small amount of K12-C600 bacteria that survived for 24 h in the macrophage,  
222 60% of K12-C600 bacteria underwent fewer than 2 divisions and less than 10%  
223 underwent 5 divisions (Supplementary Figure S4D). Second, we used TIMER to refine  
224 these observations; it provides an instantaneous evaluation of the generation time  
225 during the infection kinetics (Figure 3B and S4A and S4B). TIMER indicated that at 18 h  
226 P.I., 18% of the LF82 population was not actively dividing, supporting the existence of a  
227 non-growing or slow-growing subpopulation. Since they require dilution of fluorescent  
228 proteins both TIMER and FD are poorly informative about the first hours of the  
229 infection. Therefore, we used a GFP fusion with the septal ring protein FtsZ to monitor  
230 division in the individual bacterium (Figure 3C). In LB, exponentially growing LF82  
231 frequently presented the FtsZ ring (70% of the population), but stationary phase LF82  
232 rarely presented the FtsZ ring (<2% of the population, Figure 3D). Following infection of  
233 macrophages with the stationary phase culture of LF82 *ftsZ-gfp*, we observed that 5%  
234 (+/-2) and 40% (+/- 12) of the population, respectively, presented a FtsZ ring at 1 h and  
235 24 h P.I. (Figure 3C and 3D). Following infection with exponentially growing LF82 we  
236 observed a sudden reduction in the number of LF82 presenting a FtsZ ring at 1 h and 4h  
237 P.I. (Figure 3D). The three reporters (FD, TIMER and FtsZ) provided complementary  
238 indications: i) within macrophages, LF82 strongly slow down their cell cycle for several  
239 hours; ii) starting at 6 h P.I. LF82 multiply; in this phase the generation time may vary

240 among bacteria but can be as short as 2h; iii) a part of the population, completely halted  
241 their cell cycle and become non-grower. The difference between the number of non-  
242 growing LF82 revealed by TIMER and FD shows that non-growing LF82 are formed late  
243 in the infection kinetics and not only upon phagocytosis.

244

#### 245 **Macrophages induce the formation of antibiotic-tolerant LF82.**

246 Non-growing Salmonella phenotypes have been observed inside macrophages and  
247 during mouse infection (Helaine *et al.*, 2014; Claudi *et al.*, 2014). Being tolerant to  
248 subsequent antibiotic challenge they were recognized as persisters. We inquired  
249 whether also for AIEC LF82 the non-growing component of the population had  
250 enhanced antibiotic tolerance. In exponentially growing liquid cultures, approximately  
251 0.01% LF82 tolerated a 3 h ciprofloxacin challenge, and can therefore be considered  
252 persisters (Figure 4A). Following a brief passage through the macrophage, the frequency  
253 of LF82 bacteria tolerant to ciprofloxacin increased to 0.5 % (nearly 50 fold compared to  
254 exponentially growing LF82). Interestingly the number of tolerant LF82 reached 5%  
255 (500 fold compared exponentially growing LF82) after 24 h in the macrophage (Figure  
256 4A). This near to 10-fold increase in the number of tolerant bacteria after a 24 h  
257 intracellular period compared to a 1 h intracellular period indicates that, like non-  
258 growers, tolerant phenotypes are not exclusively formed upon infection, but also as  
259 bacteria multiply inside the macrophage. In this respect, the behavior of LF82 differs  
260 significantly from *S. typhimurium*, which forms a large number of persisters upon  
261 macrophage entry , but this population remains stable during the infection (Helaine *et*  
262 *al.*, 2014). To test if non-growing LF82 revealed by the FD assay indeed corresponded to  
263 the antibiotic-tolerant population, we used the macrophage-permeable antibiotic  
264 ofloxacin. We added ofloxacin (10x MIC) for 4 h after 20 h of intracellular growth, and  
265 we observed significant increases in the proportion of green LF82 (non-growing) inside  
266 macrophages (Figure 4B). These observations suggest that the sub-population of non-  
267 growing bacteria largely overlaps with that of persisters, where protection from  
268 antibiotics may also confer enhanced tolerance to intracellular stresses.

269

#### 270 **Tolerance to antibiotics is enhanced for LF82 compared with K12-C600 *E. coli*.**

271 We compared the number of LF82 and a non-pathogenic K12-C600 laboratory strain  
272 with tolerance to ciprofloxacin following brief (1 h) or long (24 h) passages in

273 macrophages. After a brief passage in macrophages, the proportion of LF82 that were  
274 tolerant to ciprofloxacin was significantly higher for LF82 than K12-C600 (Figure 4C).  
275 Interestingly, even if the absolute number of ciprofloxacin-tolerant K12-C600 was  
276 largely reduced compared with LF82, their proportions among bacteria that survived 24  
277 h inside macrophages were comparable (Figure 4C). These findings demonstrate that  
278 the number of antibiotic-tolerant bacteria formed in response to macrophage attack is  
279 reinforced for LF82 compared with the laboratory strain.

280

### 281 **Tolerance to antibiotics is a transient state.**

282 We next evaluated whether the antibiotic tolerance was a stable or transient phenotype.  
283 We used the macrophage lysis procedure to recover LF82 with induced persistence for 1  
284 h in the macrophage; then, we either challenged them immediately with ciprofloxacin or  
285 allowed them to recover in LB for 1 h or 2 h before antibiotic challenge. When bacteria  
286 were cultured for 1 h in LB, the frequency of tolerant bacteria was decreased in  
287 comparison to bacteria that were immediately treated with the antibiotic; however, this  
288 number was still higher than that of bacteria that had not infected macrophages. Two  
289 hours in LB was sufficient to cause a comparable frequency of ciprofloxacin-tolerant  
290 LF82 to that of bacteria that had not encountered macrophages (Figure 4D). These  
291 observations show that when the environment is no longer stressful, antibiotic-tolerant,  
292 non-growing LF82 rapidly switch back to a replicative mode.

293

294

### 295 **Characterization of non-growing LF82.**

296 Both FD and TIMER revealed slightly more non growing LF82 (4% and 18%  
297 respectively, figure 3A) than antibiotic-tolerant LF82 after macrophage lysis (0.5% at 1  
298 h P.I. or 5% at 24 h P.I. , Figure 4A). This finding raised the possibility that persists  
299 only form a portion of the non-growing population. To quantify this proportion, we  
300 infected macrophages with TIMER-tagged LF82, lysed the macrophages and allowed  
301 bacterial growth on a LB-agarose pad under the microscope at 37°C. Seventy percent of  
302 the LF82 bacteria recovered quickly from the challenge and formed microcolonies, but  
303 approximately 30% of them never divided (Figure 4E). These non-cultivable LF82  
304 presented either non-growing or growing TIMER fluorescence (Figure 4F). The presence



305 of non-cultivable LF82 among the bacteria with non-growing TIMER fluorescence  
306 explains the difference between fluorescence and antibiotic assays.

307

### 308 **SOS and stringent responses influence antibiotic tolerance.**

309 Among mutants that affected LF82 survival (Figure 1C), only the *recA*, *relA spot* and *dksA*  
310 deletions negatively impacted the number of LF82 that were tolerant to a 3h  
311 ciprofloxacin treatment (Figure 5A). The impact of the *recA* deletion might be  
312 misinterpreted because ciprofloxacin alters DNA and limits resuscitation of *recA*  
313 persisters. Therefore, we repeated the tolerance assay with cefotaxime for the following  
314 SOS mutants: *recA* (impaired for DNA lesion repair and SOS induction), *lexAind-* (unable  
315 to induce SOS) and *sulA* (unable to block cell division). *In vitro*, SOS mutants did not  
316 present defect for cefotaxime tolerance (Supplementary Figure S3B). However, these  
317 mutants exhibited a decreased tolerance to antibiotics when persisters were induced by  
318 a pretreatment with subinhibitory concentrations of ciprofloxacin (Supplementary  
319 Figure S3C). This finding is in good agreement with previous reports (Dörr *et al.*, 2009),  
320 and it confirms that SOS induction favors the production of persisters. We analyzed  
321 cefotaxime tolerance of these SOS mutants after a 1 h or 20 h period within  
322 macrophages (Figure 5B and 5C). We observed a significant reduction of the proportion  
323 of *recA* and *sulA* mutants that were tolerant to cefotaxime treatment after a 20 h passage  
324 in the macrophage (Figure 5C) but no effect on bacteria that remained only 1 h in  
325 macrophages (Figure 5B). The *lexAind-* mutation did not change the number of tolerant  
326 bacteria in these conditions. We also analyzed the *dksA* mutant in these assays;  
327 surprisingly, it behaved differently than the *recA* and *sulA* mutants: we observed a  
328 significant reduction of the proportion of cefotaxime tolerant bacteria following a 1 h  
329 passage within macrophages (Figure 5B) but not when the bacteria remained for 20 h in  
330 macrophages (Figure 5C). To test an eventual epistatic relation between SOS and  
331 stringent response we combined *recA* and *dksA* deletions. They had an additive impact  
332 on the ability of LF82 to become tolerant to cefotaxime after a brief infection (Figure 5B)  
333 and a 20-hour infection (Figure 5C). Our observations suggest that production of  
334 persister/tolerant LF82 bacteria is under the control of the stringent response in the  
335 first hours of infection and controlled by genotoxic stress, the SOS response and DNA  
336 lesion processing later in the infection. When one of these two responses is deficient the  
337 production of persister /tolerant LF82 requires the other.

338

339 **The role of SOS response and stringent response for the control of LF82 cell cycle**  
340 **in the macrophages.**

341 Knowing that SOS and stringent responses influence the production of antibiotic  
342 tolerant LF82 after a passage within macrophage we examined whether they also  
343 contributed to LF82 cell cycle control, i.e. production of non-growing, replicative or dead  
344 LF82. We used the FD assay to measure the number of non-growing LF82 in *the relA-*  
345 *spoT* and *recA* mutants. FD revealed that the non-grower number was dramatically  
346 reduced in the *relA-spoT* mutant (<1%) (Figure 5D). This suggests that in the absence of  
347 stringent response LF82 cannot immediately curb its cell cycle upon phagocytosis. By  
348 contrast the number of non-growers was unchanged for the *recA* mutant (Figure 5E).  
349 This is in agreement with the absence of effect of the *recA* deletion on the production of  
350 cefotaxime tolerant LF82 early in the infections. TIMER revealed that at 20 h P.I. the  
351 proportion of slow, mid and fast growing LF82 was affected by the alteration of *recA*,  
352 *lexAind-*, *sulA* and *dksA*. The *recA* and *dksA* deletions reduced the number of non-growing  
353 LF82; by contrast, the *lexAind-* and *sulA* mutations only increased the number of fast  
354 growing LF82 in the population (Figure 5F). Finally, the live and dead assay showed a  
355 strong increase in lethality of the *recA*, *sulA*, *lexAind-*, *relA spoT* and *dksA* mutants at both  
356 time points (Figure 5G) suggesting that in the macrophage environment a failing cell  
357 cycle control will almost certainly lead to LF82 death.

358 Altogether our results showed that the stringent response is the main controller of the  
359 early intracellular survival of LF82; it limits LF82 growth and induces the formation of  
360 non-growers and among them persisters. Later on, when replication is resumed, SOS  
361 response grows in importance. DNA lesions that have been accumulated in the lag phase  
362 must be repaired to allow replication and formation of new non-growers and new  
363 persisters.

364

365 **Kinetics of macrophage infection**

366 AIEC LF82 tolerates macrophage induced stresses, thus it survives and multiplies in the  
367 phagolysosome. The population expansion is accompanied by a rise in the number of  
368 bacteria that do not grow and tolerate an antibiotic challenge (called henceforth  
369 persisters). The change in time, during macrophage infection, of LF82 population size  
370 and fraction of persisters are relevant to future fundamental studies, but also to devising



371 therapeutic strategies involving AIEC or other intracellular pathogens. In order to  
372 explore the mechanistic bases of the infection kinetics, we have used a mathematical  
373 model (Figure 6A) to fit the observed changes in CFU and persister counts during 24 h  
374 for LF82, K12-C600 and the stringent response mutant LF82*dk*sA (Figure 6B). The  
375 model is based on the following biologically-informed hypotheses (illustrated in Figure  
376 6A and detailed in the Supplementary text 1). i) Reproduction: the population of  
377 replicating bacteria B has a constant net growth rate (birth minus death rate)  $\delta_1$ , which  
378 is either 0 or negative during a lag phase of duration  $\lambda$ , and  $\beta > 0$  otherwise. ii) A stress-  
379 induced death rate,  $\delta_2(S)$  that increases with stress (S). We assume that stress S, possibly  
380 due to lesions (DNA lesions, membrane alterations, oxidative damages among others)  
381 that accumulate over time or due to a macrophage response to the infection, builds up in  
382 time proportionally to the total number of bacteria in the population. iii) Switch to  
383 persistence: bacteria have a constant probability  $k_p$  of generating non-growing, stress-  
384 tolerant phenotypes P. The dynamics of a population of bacteria can be described by a  
385 set of three ordinary differential equations for the number B of non-persister bacteria,  
386 the number P of persisters, and the stress variable S (Methods). The number of dead  
387 bacteria D can be derived from these under the assumption that dead LF82 bacteria  
388 decay exponentially with rate 0.56 (computed from the assay in Supplementary Figure  
389 2C). The model has a total of 12 parameters for the three strains, which are fitted to data  
390 as explained in Methods and SI. Although LF82 displays a considerable overshoot in  
391 population size (as also observed in (Glasser *et al*, 2001)), the dynamics can be  
392 reproduced by choosing the same  $\beta$  for every strain. We estimated such net growth rate  
393 to  $0.15 \pm 0.003 \text{ h}^{-1}$ , corresponding to 0.21 divisions per hour (Figure 6B), consistent with  
394 independent cell-level measures by FD (Supplementary Figure 4). The most notable  
395 quantitative difference between strains is that K12-C600 displayed a lag phase of more  
396 than 13 h, twice as long as LF82 and LF82*dk*sA. A consequence of this difference is that  
397 when K12-C600 bacteria start actively duplicating, stress has already built up. Together  
398 with K12-C600's enhanced sensitivity to stress, this curbs the population expansion,  
399 resulting in a lower overall growth within macrophages. In the LF82*dk*sA mutant,  
400 growth is instead impaired by increased initial mortality (whose rate  $\delta_1$  has been  
401 estimated by PI measures, Supplementary Figure S2C), presumably related to stringent  
402 response failure. With respect to the other strains, moreover, LF82 is advantaged at  
403 later times – when the SOS response becomes important – thanks to reduced stress-

404 induced death rate. Rate of persistence production for LF82 and LF82 *dksA* (0.08 and  
405 0.002 h<sup>-1</sup>, respectively) is estimated to be higher than for K12-C600 (0.001 h<sup>-1</sup>) ,  
406 supporting the notion that AIEC strains within macrophages turn to persisters at an  
407 enhanced rate, but less so if their stringent response is impaired. The model allows  
408 testing changes in infection dynamics for ‘virtual mutants’ LF82\*, obtained by varying  $k_p$ ,  
409  $\lambda$  and  $d_{max}$  – the parameters that quantitatively differ between LF82 and *E. coli* K12-C600  
410 (Figure 6C). The total population overshoot is enhanced when lag phase is shorter and  
411 the effect of stress less acute, but damped when persisters production is more frequent.  
412 Interestingly, the phenotypes of the single stress response mutants (acid, oxidative, lack  
413 of Mg<sup>2+</sup>), i.e. reduced CFU at 24 h without perturbation of the persister proportion in the  
414 population (Figure 1C and 3A) were nicely reproduced by a change in the single  $d_{max}$   
415 parameter. This suggests that the model can be used to plan future works on the effect  
416 of mutants or drugs on macrophage colonization by AIEC.

417

418

## 419 **Discussion**

420 We analyzed the growth and survival strategies used by the prototype AIEC strain LF82  
421 to colonize the human monocytes-derived THP1 macrophages. Our analysis revealed  
422 that intracellular LF82 are constantly under stress while colonizing macrophages. The  
423 consequences of these stresses are important: increase in the death rate of bacteria,  
424 slow multiplication of replicating bacteria and formation of a large number of non-  
425 growing bacteria. LF82 adapts to this environment thanks to successive phenotypic  
426 switches that require the two main stress responses: the SOS response and the stringent  
427 response (Figure 7).

428

### 429 **Macrophages place LF82 under lethal stress.**

430 Using fluorescent reporters, we measured that half of the LF82 population present at 24  
431 h P.I. had given rise to 6 or more generations. Under controlled laboratory conditions,  
432 this should produce a 30 to 60-fold increase in the population size at 20 h compared  
433 with the 1 h time point PI. However, we only observed a 3 to 6-fold increase in viable  
434 bacteria at 20-24 h compared with 1 h. We demonstrated that this modest colonization  
435 of macrophages by LF82 is explained by a big death rate and switch from replicative to  
436 non-growing cell cycle. At the single-macrophage and single-bacterium level, FD and

437 TIMER fluorescent reporters revealed non-growing LF82. We observed macrophages  
438 containing few (less than 4) LF82 with red fluorescent dilution staining. These bacteria  
439 had therefore divided several times ( $>4$ ) before observation and thus should be  
440 accompanied by their siblings ( $>16$ ). This observation is in good agreement with our  
441 Live and Dead assay indicating that LF82 progeny has a significant chance to be killed  
442 and destroyed by the macrophage. By contrast, some macrophages contained growing  
443 LF82 and ultimately acquired more than 50 bacteria in one or several compartments.  
444 The live and dead assay confirmed that LF82 was frequently killed by macrophages.  
445 Because alterations of bacterial stress responses significantly reduced the bacterial  
446 yield, we propose that LF82 death is the consequence of oxidative, acid, genotoxic and  
447 protein stresses imposed by the macrophage. We compounded these experimental  
448 observations in a mathematical model describing the dynamics of bacterial infection  
449 within macrophages. A first phase of stalled growth, a likely combined effect of a  
450 prolonged lag phase and of compensation between death and division, is followed by an  
451 exponential increase in bacterial concentration. This second phase might correlate with  
452 a transient increased permissiveness of phagolysosomes or more likely the adaptation  
453 of LF82 to growth in this stressful environment. This expansion is successively curbed  
454 by the building-up of stressors. Many persisters are formed in the first phase. However,  
455 in the second phase a phenotypic switch to non-growing LF82 will eventually result in a  
456 sizeable increase of the persister population. We thus understand the survival of LF82 as  
457 a consequence of its ability to adapt to harsh phagolysosome environment both at the  
458 entry of the macrophage, by induction of stress responses and particularly the stringent  
459 response, and during exponential expansion by SOS response. LF82 advantage over K12-  
460 C600 would reside in its ability to exit from the lag phase to perform a few rounds of  
461 replication/division before stress becomes too strong (Figure 6). Strategically, early  
462 onset of growth is compensated by production of persistent bacteria, which endows the  
463 pathogenic strain with long-term survival in spite of rapid exploitation of the  
464 macrophage environment. We have not yet identified LF82 specific regulons, genes or  
465 mutations that allow this transition to take place.

466

#### 467 **Replicative LF82.**

468 Fluorescent dilution revealed that after the exit of lag phase LF82 replicated moderately  
469 within macrophages, with generation time longer than 2 h. *In vitro*, this would be

470 comparable with generation times observed in minimal medium with poor carbon  
471 sources such as acetate. Our observations revealed that within macrophages, 40% of the  
472 LF82 population presented an FtsZ ring, which is significantly above the number  
473 expected from a mixed population of *E. coli* growing with a 2h generation time (28% of  
474 cells with FtsZ ring (den Blaauwen *et al*, 2001)) and non-growing cells. Interestingly, in  
475 spite of SulaA induction, we did not observe filamentation of LF82 within macrophage.  
476 These finding demonstrates that some of the cell cycle rules that were established under  
477 defined *in vitro* conditions do not apply to intracellular growth conditions, opening  
478 avenues for future investigations of bacterial cell cycle regulation in the context of host  
479 infection or the microbiota.

480

#### 481 **Non-replicative LF82.**

482 FD and TIMER revealed that a significant number of intracellular LF82 were not  
483 growing. FD revealed that approximately 4% of the phagocytosed LF82 immediately  
484 halted their cell cycle. TIMER revealed that at 20 h P.I., approximately 20% of the LF82  
485 population was not growing. We also demonstrated that once the macrophages were  
486 lysed, a large portion of the LF82 population (from 0.3 to 10%) was tolerant to several  
487 hours of antibiotic challenge, and the proportion of non-growers in the population  
488 increased in macrophages in the presence of antibiotics. Altogether, these observations  
489 suggest that the phagolysosome environment induces frequent cell cycle arrests among  
490 the population and that a part of this arrested population is persists or tolerant to  
491 antibiotics. Such a phenomenon has been previously described during *S. typhimurium*  
492 infection of macrophages (Helaine *et al.*, 2014) or mice (Helaine *et al.*, 2014; Claudi *et al.*,  
493 2014) and is reminiscent of VBNR mycobacteria (Manina *et al.*, 2015). Interestingly, we  
494 observed an increase in the proportion of macrophage-induced antibiotic-tolerant LF82  
495 at later time points, suggesting adaptive responses to the intracellular  
496 microenvironment.

497

#### 498 **Stress responses are important for LF82 survival within macrophages.**

499 As expected for bacteria residing in a toxic environment, stress responses are important  
500 for LF82 survival within macrophages. Acidic, oxidative, genotoxic, and envelope  
501 alterations, lack of Mg<sup>2+</sup> and lack of nutrient stress responses significantly decreased  
502 the fitness of LF82 (50 to 10% of WT). In a few cases, we demonstrated an additive

503 effect of simultaneously altering two pathways. However, LF82 demonstrated  
504 surprisingly good tolerance to these alterations compared with the *in vitro* findings for  
505 individual stresses. For example, *recA* deletion mutant was extremely sensitive (<1%  
506 survival) to prolonged treatment with genotoxic drugs (Supplementary Figure S3A); by  
507 comparison, in macrophages, despite clear SOS induction, the viability of the *recA*  
508 mutant was only reduced by half compared with wild type bacteria. Set aside the  
509 possibility that stress-less niches exist due a possible heterogeneity in the macrophage  
510 population, the fitness decline of LF82 stress mutants may be limited by a combination  
511 of slow growth, formation of non-growers and/or yet uncharacterized adaptation  
512 pathways.

513

#### 514 **SOS and stringent responses successively control LF82 fate.**

515 We investigated the trigger that could allow some LF82 to halt their cell cycle inside  
516 macrophages. It appeared to be unrelated to the ability to sense acidic or oxidative  
517 stress . At an early time point, stringent response mutants altered the survival and  
518 production of antibiotic-tolerant LF82 suggesting that abrupt nutrient starvation is one  
519 of the first signals received by LF82 upon phagocytosis. The early stringent response  
520 should result in a slowdown of transcription, translation and DNA replication, and  
521 therefore, it might provoke the formation of non-growers and a 7-h lag phase . We  
522 assessed whether the stringent response impaired the declines in viability in this first  
523 period, and we observed a decrease in the number of bacteria with undiluted GFP using  
524 the FD assay, as well as a reduction in antibiotic-tolerant LF82 induction. This suggests  
525 that the slowing down induced by the stringent response confers a temporary  
526 protection than can be extended to antibiotic tolerance when bacteria become  
527 persisters. Accordingly the impact of stringent response alteration was less apparent  
528 after the lag phase when replication is re-established in a portion of the population of  
529 LF82. SOS induction was moderate at 1 h but important at 6 h and 24 h P.I.; this is in  
530 good agreement with the lack of an effect of *recA* deletion on the accumulation of LF82  
531 with undiluted FD GFP and the lack of an influence of SOS mutants on the number of  
532 LF82 that were tolerant to cefotaxim at 1 h after infection. DNA lesions could, however,  
533 form during this period, but they were mostly observed when DNA replication restarted  
534 after 6 h. In this second phase of infection, SOS induction in replicative bacteria might  
535 play several roles: i) sustaining DNA repair and therefore DNA replication, cell division

536 and increases in population size; ii) decelerating the division progression, this is the role  
537 of SulaA, and thus contributing to the formation of new non-growers ; iii) intervening for  
538 resuscitation of non-growers presenting DNA lesions, both within macrophages and  
539 after macrophage lysis.

540

#### 541 **Macrophages as a niche for LF82 survival**

542 The purpose of macrophage colonization by LF82 in Crohn's disease patients is not yet  
543 understood. *In vitro*, LF82 colonization did not provoke extensive death of macrophages,  
544 which are thus unlikely to serve as a transient replicative niche for ileal infection.  
545 Alternatively, we can imagine that dormant LF82 within macrophages can serve as a  
546 long-term storage. In this environment, bacteria might be protected from competition  
547 with other species of the microbiota and coincidentally from antibiotics. Upon  
548 macrophage lysis or inactivation, dormant LF82 would be released and would start to  
549 multiply under adequate conditions.

550

#### 551 **Methods**

##### 552 **Strains and plasmids**

553 Deletion mutants (Supplementary Table S1) were constructed using the recombineering  
554 method as described in (Demarre *et al.*, 2017). Plasmids are described in Supplementary  
555 Table S2.

556

##### 557 **Infection and microscopy**

558 THP1 monocytes ( $5 \times 10^5$  cells/ml) differentiated into macrophages for 18 h in phorbol  
559 12-myristate 13-acetate (PMA, 20 ng/ml) were infected and imaged as previously  
560 described (Demarre *et al.*, 2017). Infections were performed at MOI 30 (measured by  
561 CFU), resulting in the observation of 3 LF82 bacteria per macrophage on average at 1 h  
562 P.I.. Imaging was performed on an inverted Zeiss Axio Imager with a spinning disk CSU  
563 W1 (Yokogawa).

564

565

##### 566 **Antibiotic challenge and viable bacterial count using the gentamycin protection** 567 **assay**



568 To determine the number of intracellular bacteria after 20 min of infection, infected  
569 macrophages were washed twice with PBS, and fresh cell culture medium containing 20  
570  $\mu\text{g ml}^{-1}$  of gentamicin (Gm) was added for the indicated time (1 h to 30 h). Cell  
571 monolayers were washed once with PBS, and 0.5 ml of 1% Triton X-100 in 1x PBS was  
572 added to each well for 5 min to lyse eukaryotic cells (Bringer *et al.*, 2006). Samples were  
573 mixed, diluted and plated on LB agar plates to determine the number of colony-forming  
574 units (CFU) recovered from the lysed monolayers. For the antibiotic tolerance assays,  
575 macrophage lysates were transferred to 5-ml tubes and centrifuged for 10 min at 4100  
576 g. The pellet was either suspended in 1x PBS (t0) and ciprofloxacin (1  $\mu\text{g/ml}$ ) for 1 h and  
577 3 h, or in LB and cefotaxim (100  $\mu\text{g/ml}$ ) for 1 h and 3 h. CFU were measured by serial  
578 dilution. Tolerance was estimated for the 1-h and 3-h time points as a function of the  
579 CFU at t0.

580

### 581 **Live and dead assay**

582 At the indicated time points, macrophages were lysed with vigorous resuspension in 1x  
583 PBS 1% Triton. The cell lysate was pelleted at 300 g for 10 min to eliminate large cell  
584 remnants. The supernatant was centrifuged at 4000 g for 10 min. The bacterial pellet  
585 was suspended in 1x PBS and processed with the Live and Dead BacLight Viability kit  
586 (Thermo Fisher). The bacteria were pelleted for 3 min at 5000 g, resuspended in 50  $\mu\text{l}$  of  
587 1x PBS and spread on a 1% agarose 1x PBS pad for immediate observation.

588

### 589 **Measurement of gene expression by RT-qPCR**

590 Total RNA was extracted with TRIzol reagent from  $10^6$  macrophages, as described in the  
591 *Molecular Cloning, a laboratory Manual* (Green and Sambrook, CSH Press). First-strand  
592 cDNA synthesis was performed with the Maxima First Strand cDNA Synthesis Kit for RT-  
593 qPCR (Thermo Fisher), and real-time qPCR was performed with SYBR Green Master Mix  
594 (Bio-Rad) on a MyiQ real-time qPCR machine (Bio-Rad).

595

### 596 **Fluorescence quantification**

597 Custom-made FIJI macros were developed for the analyses of fluorescence. For the  
598 Biosensors and FD, constitutive expression of mCherry from p-mCherry was used to  
599 construct bacterial masks, which were subsequently used to measure GFP intensity. For

600 TIMER analyses, green fluorescence was used to construct the mask. Fluorescence  
601 distributions were analyzed with the distribution fitting tool in MATLAB.

602

### 603 **Mathematical model for the infection kinetics**

604 A set of three ODEs recapitulates the main features of the observed growth within  
605 macrophages, as explained in the main text and in the SI:

$$\begin{aligned}\frac{dB}{dt} &= [1 - I(t < \lambda)]\beta B - k_p B - I(t < \lambda)\delta_1 B - \delta_2(S)B \\ \frac{dP}{dt} &= k_p B \quad (1) \\ \frac{dS}{dt} &= B + P\end{aligned}$$

606 Here,  $I(t < \lambda)$  is the indicator function, which is unitary during lag phase. At the  
607 beginning of the infection, thus, the net growth rate  $-\delta_1$  is either zero (K12-C600 and  
608 LF82) or negative (stringent response mutant LF82dskA). At later times, net growth rate  
609  $\beta$  is instead positive. The stress-induced death rate has been chosen to be a sigmoidal  
610 function of the stress level:

$$611 \delta_2(S) = \frac{d_{max}}{1 + e^{a(S - S_{1/2})}}$$

612 where the half-saturation stress value  $S_{1/2}$  and the sensitivity parameter  $a$  are assumed  
613 to be identical for all strains. Here stress is an effective variable quantifying the effect of  
614 crowding on growth within macrophages, and could correspond both to density-  
615 dependent reduction of bacterial growth rate (e.g. due to resource depletion), and to the  
616 progressive buildup of macrophage-induced killing.

617

### 618 **Fit of the infection kinetics data**

619 Parameters providing the best fit of eqs. (1) to the times series of CFUs and persisters  
620 have been obtained by a weighted least-square distance minimization using the python  
621 differential evolution algorithm. We used a two-step approach to the fit which allowed us to  
622 establish first a subset of 7 parameters ( $\lambda$  and  $k_p$  for each strain and  $\beta$ ) that shape the lag  
623 and exponential phases of growth. Subsequently, we fixed  $\beta$  and the  $\lambda$ s, and fitted the  
624 remaining parameters. Details of the fitting procedure are found in the SI, and the  
625 results of the fit in Table 1 of the Supplementary text.

626

627



628 **Acknowledgments**

629 We gratefully acknowledge Laurent Aussel, Dirk Bumann, Sophie Helaine, Jakob Moller  
630 Jensen and Fabai Wu for providing the biosensors and fluorescent cell cycle reporters.  
631 We thank Parul Singh and Xavier de Bolle for careful reading of the manuscript and  
632 fruitful discussions. We are very grateful to the members of the CIRB imaging facility.  
633 This work has received support from the program «Investissements d’Avenir » launched  
634 by the French Government and implemented by ANR with the references ANR--10--  
635 LABX--54 MEMOLIFE and ANR--11--IDEX--0001--02 PSL\* Research University, from the  
636 ANR with the reference ANR-18-CE35-0007 and the support of the association François  
637 Aupetit (AFA).

638

639

640 Table S1. Strains

| Name                    | genotype                                                   | description                                                 | reference                      |
|-------------------------|------------------------------------------------------------|-------------------------------------------------------------|--------------------------------|
| AIEC LF82               |                                                            |                                                             | (Glasser <i>et al.</i> , 2001) |
| AIEC LF82 $\Delta$ bla  | <i>ampC</i>                                                |                                                             | Gift from Nicolas Barnich      |
| AIEC LF82 $\Delta$ htrA | <i>htrA</i>                                                |                                                             | (Bringer <i>et al.</i> , 2005) |
| AIEC LFGD1              | AIEC LF82 $\Delta$ bla <i>relA::kan</i>                    |                                                             | This work                      |
| AIEC LFGD4              | AIEC LF82 $\Delta$ bla <i>ydeO::kan</i>                    |                                                             | This work                      |
| AIEC LFGD6              | AIEC LF82 $\Delta$ bla <i>lon::kan</i>                     |                                                             | This work                      |
| AIEC LFGD9              | AIEC LF82 $\Delta$ bla <i>recA::kan</i>                    |                                                             | This work                      |
| AIEC LFGD11             | AIEC LF82LF82 $\Delta$ bla <i>HupA-mcherry-FRT-kan-FRT</i> |                                                             | This work                      |
| AIEC LFGD13             | AIEC LF82 $\Delta$ bla <i>pspA::kan</i>                    |                                                             | This work                      |
| AIEC LFGD15             | AIEC LF82 $\Delta$ bla <i>soxS::kan</i>                    |                                                             | This work                      |
| AIEC LFGD27             | AIEC LF82 $\Delta$ bla <i>phoP::kan</i>                    |                                                             | This work                      |
| AIEC LFGD30             | AIEC LF82 $\Delta$ bla <i>evgA evgS::kan</i>               |                                                             | This work                      |
| AIEC LFGD40             | AIEC LF82 $\Delta$ bla <i>evgAS-FRT phoP::kan</i>          |                                                             | This work                      |
| AIEC LFGD41             | AIEC LF82 $\Delta$ bla <i>evgAevgS-FRTydeO::kan</i>        |                                                             | This work                      |
| AIEC LFGD56             | AIEC LF82 $\Delta$ bla <i>relA-FRT</i>                     |                                                             | This work                      |
| AIEC LFGD57             | AIEC LF82 $\Delta$ bla <i>relA-FRT spoT::kan</i>           |                                                             | This work                      |
| AIEC LFGD69             | AIEC LF82 $\Delta$ bla <i>lexAind::kan</i>                 | Mutation X-> Y in <i>lexA</i> constructed by recombineering | This work                      |
| AIEC LFGD79             | AIEC LF82 $\Delta$ bla <i>dksA::kan</i>                    |                                                             | This work                      |

|                         |                                                     |  |                                                               |
|-------------------------|-----------------------------------------------------|--|---------------------------------------------------------------|
| AIEC LFER1              | AIEC LF82 $\Delta bla$ <i>lexAind-FRT dksA::kan</i> |  | This work                                                     |
| AIEC LFER2              | AIEC LF82 $\Delta bla$ <i>dksA-FRT recA::kan</i>    |  | This work                                                     |
| AIEC LFGD86             | AIEC LF82 $\Delta bla$ <i>sulA::kan</i>             |  | This work                                                     |
| AIEC LFGD83             | AIEC LF82 $\Delta bla$ <i>ppk-ppX::kan</i>          |  | This work                                                     |
| AIEC LF82 $\Delta rpoS$ | <i>rpoS::kan</i>                                    |  | Gift from Jakob Moller Jensen (Simonsen <i>et al.</i> , 2011) |

641

642

643 Table S2. Plasmids

| name             | description                              | Antibiotic resistance | reference                                               |
|------------------|------------------------------------------|-----------------------|---------------------------------------------------------|
| pKOBEGA          |                                          | ampR specR            | (Derbise <i>et al.</i> , 2003)                          |
| pAD37            | Matrix vector for recombineering         | kanR                  | (David <i>et al.</i> , 2014)                            |
| pFWZ5            | Para-fts-sfGFP-T::aph                    | kanR                  | Gift from Fabai Wu (Wu <i>et al.</i> , 2015)            |
| pFCcGi           | pFP25 <i>PrpsM-mCherry</i> , ParaBAD-GFP | ampR                  | Gift from Sophie Helaine (Helaine <i>et al.</i> , 2014) |
| pPrpsm-mcherry   | pGBM2- <i>PrpsM-mCherry</i>              | specR                 | This work                                               |
| pSC101-TIMER bac |                                          |                       | Gift from Dirk Bumann (Claudi <i>et al.</i> , 2014)     |
| pom1-GFP         | pGBM2-Pro3-GFP                           |                       | (Espéli <i>et al.</i> , 2001)                           |

|           |                                     |      |                                                                                     |
|-----------|-------------------------------------|------|-------------------------------------------------------------------------------------|
| pLA42     | pFPV25 PkatG-gfpmut3                | ampR | Gift from Laurent Aussel (Viala <i>et al.</i> , 2011; Hébrard <i>et al.</i> , 2009) |
| pP1485    | pFPV25 <i>Pasr-gfp</i>              | ampR | Gift from Laurent Aussel (Viala <i>et al.</i> , 2011; Hébrard <i>et al.</i> , 2009) |
| pmgtC     | pFPV25 <i>PmgtC-gfp</i>             | ampR | Gift from Laurent Aussel (Viala <i>et al.</i> , 2011; Hébrard <i>et al.</i> , 2009) |
| pSulA-GFP | pZA31MCS-delta Xho <i>PsulA-GFP</i> |      | (Esnault <i>et al.</i> , 2007)                                                      |

644

645

## 646 **References**

- 647 Amato SM & Brynildsen MP (2015) Persister Heterogeneity Arising from a Single  
648 Metabolic Stress. *Curr. Biol. CB* **25**: 2090–2098
- 649 Amato SM, Fazen CH, Henry TC, Mok WWK, Orman MA, Sandvik EL, Volzing KG &  
650 Brynildsen MP (2014) The role of metabolism in bacterial persistence. *Front.*  
651 *Microbiol.* **5**: 70
- 652 Balaban NQ, Merrin J, Chait R, Kowalik L & Leibler S (2004) Bacterial persistence as a  
653 phenotypic switch. *Science* **305**: 1622–1625
- 654 Barnich N, Bringer M-A, Claret L & Darfeuille-Michaud A (2004) Involvement of  
655 lipoprotein NlpI in the virulence of adherent invasive Escherichia coli strain LF82  
656 isolated from a patient with Crohn's disease. *Infect. Immun.* **72**: 2484–2493
- 657 Bernier SP, Lebeaux D, DeFrancesco AS, Valomon A, Soubigou G, Coppée J-Y, Ghigo J-M &  
658 Beloin C (2013) Starvation, together with the SOS response, mediates high  
659 biofilm-specific tolerance to the fluoroquinolone ofloxacin. *PLoS Genet.* **9**:  
660 e1003144
- 661 Bigger J (1944) TREATMENT OF STAPHYLOCOCCAL INFECTIONS WITH PENICILLIN BY  
662 INTERMITTENT STERILISATION. *The Lancet* **244**: 497–500
- 663 den Blaauwen T, Lindqvist A, Löwe J & Nanninga N (2001) Distribution of the  
664 Escherichia coli structural maintenance of chromosomes (SMC)-like protein  
665 MukB in the cell. *Mol. Microbiol.* **42**: 1179–1188
- 666 Bringer M-A, Barnich N, Glasser A-L, Bardot O & Darfeuille-Michaud A (2005) HtrA  
667 stress protein is involved in intramacrophagic replication of adherent and  
668 invasive Escherichia coli strain LF82 isolated from a patient with Crohn's disease.  
669 *Infect. Immun.* **73**: 712–721
- 670 Bringer M-A, Billard E, Glasser A-L, Colombel J-F & Darfeuille-Michaud A (2012)  
671 Replication of Crohn's disease-associated AIEC within macrophages is dependent  
672 on TNF- $\alpha$  secretion. *Lab. Investig. J. Tech. Methods Pathol.* **92**: 411–419
- 673 Bringer M-A, Glasser A-L, Tung C-H, Méresse S & Darfeuille-Michaud A (2006) The  
674 Crohn's disease-associated adherent-invasive Escherichia coli strain LF82  
675 replicates in mature phagolysosomes within J774 macrophages. *Cell. Microbiol.* **8**:  
676 471–484
- 677 Bringer M-A, Rolhion N, Glasser A-L & Darfeuille-Michaud A (2007) The oxidoreductase  
678 DsbA plays a key role in the ability of the Crohn's disease-associated adherent-  
679 invasive Escherichia coli strain LF82 to resist macrophage killing. *J. Bacteriol.*  
680 **189**: 4860–4871
- 681 Cieza RJ, Hu J, Ross BN, Sbrana E & Torres AG (2015) The IbeA invasin of adherent-  
682 invasive Escherichia coli mediates interaction with intestinal epithelia and  
683 macrophages. *Infect. Immun.* **83**: 1904–1918

- 684 Claudi B, Spröte P, Chirkova A, Personnic N, Zankl J, Schürmann N, Schmidt A & Bumann  
685 D (2014) Phenotypic variation of Salmonella in host tissues delays eradication by  
686 antimicrobial chemotherapy. *Cell* **158**: 722–733
- 687 Darfeuille-Michaud A, Neut C, Barnich N, Lederman E, Di Martino P, Desreumaux P,  
688 Gambiez L, Joly B, Cortot A & Colombel JF (1998) Presence of adherent  
689 Escherichia coli strains in ileal mucosa of patients with Crohn's disease.  
690 *Gastroenterology* **115**: 1405–1413
- 691 David A, Demarre G, Muresan L, Paly E, Barre F-X & Possoz C (2014) The two Cis-acting  
692 sites, parS1 and oriC1, contribute to the longitudinal organisation of Vibrio  
693 cholerae chromosome I. *PLoS Genet.* **10**: e1004448
- 694 Demarre G, Prudent V & Espéli O (2017) Imaging the Cell Cycle of Pathogen E. coli  
695 During Growth in Macrophage. *Methods Mol. Biol. Clifton NJ* **1624**: 227–236
- 696 Derbise A, Lesic B, Dacheux D, Ghigo JM & Carniel E (2003) A rapid and simple method  
697 for inactivating chromosomal genes in Yersinia. *FEMS Immunol. Med. Microbiol.*  
698 **38**: 113–116
- 699 Dörr T, Lewis K & Vulić M (2009) SOS response induces persistence to fluoroquinolones  
700 in Escherichia coli. *PLoS Genet.* **5**: e1000760
- 701 Elhenawy W, Oberc A & Coombes BK (2018) A polymicrobial view of disease potential in  
702 Crohn's-associated adherent-invasive E. coli. *Gut Microbes* **9**: 166–174
- 703 Esnault E, Valens M, Espéli O & Boccard F (2007) Chromosome structuring limits  
704 genome plasticity in Escherichia coli. *PLoS Genet.* **3**: e226
- 705 Espéli O, Moulin L & Boccard F (2001) Transcription attenuation associated with  
706 bacterial repetitive extragenic BIME elements. *J. Mol. Biol.* **314**: 375–386
- 707 Glasser AL, Boudeau J, Barnich N, Perruchot MH, Colombel JF & Darfeuille-Michaud A  
708 (2001) Adherent invasive Escherichia coli strains from patients with Crohn's  
709 disease survive and replicate within macrophages without inducing host cell  
710 death. *Infect. Immun.* **69**: 5529–5537
- 711 Haeusser DP & Levin PA (2008) The great divide: coordinating cell cycle events during  
712 bacterial growth and division. *Curr. Opin. Microbiol.* **11**: 94–99
- 713 Hajduk IV, Rodrigues CDA & Harry EJ (2016) Connecting the dots of the bacterial cell  
714 cycle: Coordinating chromosome replication and segregation with cell division.  
715 *Semin. Cell Dev. Biol.* **53**: 2–9
- 716 Harms A, Fino C, Sørensen MA, Semsey S & Gerdes K (2017) Prophages and Growth  
717 Dynamics Confound Experimental Results with Antibiotic-Tolerant Persister  
718 Cells. *mBio* **8**:
- 719 Hébrard M, Viala JPM, Méresse S, Barras F & Aussel L (2009) Redundant hydrogen  
720 peroxide scavengers contribute to Salmonella virulence and oxidative stress  
721 resistance. *J. Bacteriol.* **191**: 4605–4614

- 722 Helaine S, Cheverton AM, Watson KG, Faure LM, Matthews SA & Holden DW (2014)  
723 Internalization of Salmonella by macrophages induces formation of  
724 nonreplicating persisters. *Science* **343**: 204–208
- 725 Jonas K (2014) To divide or not to divide: control of the bacterial cell cycle by  
726 environmental cues. *Curr. Opin. Microbiol.* **18**: 54–60
- 727 Kim J-S & Wood TK (2017) Tolerant, Growing Cells from Nutrient Shifts Are Not  
728 Persister Cells. *mBio* **8**:
- 729 Kreuzer KN (2013) DNA damage responses in prokaryotes: regulating gene expression,  
730 modulating growth patterns, and manipulating replication forks. *Cold Spring*  
731 *Harb. Perspect. Biol.* **5**: a012674
- 732 Lapaquette P, Bringer M-A & Darfeuille-Michaud A (2012) Defects in autophagy favour  
733 adherent-invasive Escherichia coli persistence within macrophages leading to  
734 increased pro-inflammatory response. *Cell. Microbiol.* **14**: 791–807
- 735 Lewis K (2010) Persister cells. *Annu. Rev. Microbiol.* **64**: 357–372
- 736 Manina G, Dhar N & McKinney JD (2015) Stress and host immunity amplify  
737 Mycobacterium tuberculosis phenotypic heterogeneity and induce nongrowing  
738 metabolically active forms. *Cell Host Microbe* **17**: 32–46
- 739 Margolin W & Bernander R (2004) How do prokaryotic cells cycle? *Curr. Biol. CB* **14**:  
740 R768-770
- 741 Miquel S, Claret L, Bonnet R, Dorboz I, Barnich N & Darfeuille-Michaud A (2010) Role of  
742 decreased levels of Fis histone-like protein in Crohn's disease-associated  
743 adherent invasive Escherichia coli LF82 bacteria interacting with intestinal  
744 epithelial cells. *J. Bacteriol.* **192**: 1832–1843
- 745 Mouton JM, Helaine S, Holden DW & Sampson SL (2016) Elucidating population-wide  
746 mycobacterial replication dynamics at the single-cell level. *Microbiol. Read. Engl.*  
747 **162**: 966–978
- 748 Radzikowski JL, Vedelaar S, Siegel D, Ortega AD, Schmidt A & Heinemann M (2016)  
749 Bacterial persistence is an active  $\sigma$ S stress response to metabolic flux limitation.  
750 *Mol. Syst. Biol.* **12**: 882
- 751 Rao NN & Kornberg A (1999) Inorganic polyphosphate regulates responses of  
752 Escherichia coli to nutritional stringencies, environmental stresses and survival  
753 in the stationary phase. *Prog. Mol. Subcell. Biol.* **23**: 183–195
- 754 Rycroft JA, Gollan B, Grabe GJ, Hall A, Cheverton AM, Larrouy-Maumus G, Hare SA &  
755 Helaine S (2018) Activity of acetyltransferase toxins involved in  
756 Salmonella persister formation during macrophage infection. *Nat. Commun.* **9**:  
757 1993
- 758 Shan Y, Brown Gandt A, Rowe SE, Deisinger JP, Conlon BP & Lewis K (2017) ATP-  
759 Dependent Persister Formation in Escherichia coli. *mBio* **8**:

- 760 Sharma UK & Chatterji D (2010) Transcriptional switching in *Escherichia coli* during  
761 stress and starvation by modulation of sigma activity. *FEMS Microbiol. Rev.* **34**:  
762 646–657
- 763 Simonsen KT, Nielsen G, Bjerrum JV, Kruse T, Kallipolitis BH & Møller-Jensen J (2011) A  
764 role for the RNA chaperone Hfq in controlling adherent-invasive *Escherichia coli*  
765 colonization and virulence. *PloS One* **6**: e16387
- 766 Tawfik A, Flanagan PK & Campbell BJ (2014) *Escherichia coli*-host macrophage  
767 interactions in the pathogenesis of inflammatory bowel disease. *World J.*  
768 *Gastroenterol.* **20**: 8751–8763
- 769 Verstraeten N, Knapen W, Fauvart M & Michiels J (2016) A Historical Perspective on  
770 Bacterial Persistence. *Methods Mol. Biol. Clifton NJ* **1333**: 3–13
- 771 Viala JPM, Méresse S, Pocachard B, Guilhon A-A, Aussel L & Barras F (2011) Sensing and  
772 adaptation to low pH mediated by inducible amino acid decarboxylases in  
773 *Salmonella*. *PloS One* **6**: e22397
- 774 Wood TK, Knabel SJ & Kwan BW (2013) Bacterial persister cell formation and  
775 dormancy. *Appl. Environ. Microbiol.* **79**: 7116–7121
- 776 Wu F, Van Rijn E, Van Schie BGC, Keymer JE & Dekker C (2015) Multi-color imaging of  
777 the bacterial nucleoid and division proteins with blue, orange, and near-infrared  
778 fluorescent proteins. *Front. Microbiol.* **6**: 607
- 779
- 780



781 **Legend of the figures**

782 **Figure 1. Intracellular LF82 multiplication requires stress responses.** A) Measure of  
783 viable and dead AIEC LF82 for 24 h post-infection of THP1 differentiated macrophages.  
784 Circles represent average CFU (blue) and Propidium iodide (PI) positive bacteria (black)  
785  $\pm$  Standard deviation (SD) (dotted lines). To minimize variability this experiment has  
786 been performed on one set of THP1 amplified for 8 days before differentiation. B)  
787 Analysis by qRT-PCR of the induction of LF82 stress responses at 1 h, 6 h and 24 h P.I. of  
788 THP1 macrophages. Values represent the average of two experiments (3 technical  
789 replicate each). C) Proportion of viable bacteria at 24 h P.I. of THP1 macrophages in  
790 comparison to 1 h. LF82, K12-C600 and LF82 deletion mutants were infected at a MOI of  
791 30 which corresponds to 0 - 5 visible bacteria per macrophage at time point 1h (Figure  
792 2A). Values represent the average of 3 to 7 experiments  $\pm$  SD. Horizontal lines indicate  
793 viability decrease by 2, 5 and 10 fold compared to WT LF82.

794

795 **Figure 2. Intracellular LF82 show heterogeneous stress responses.** A) Imaging of  
796 THP1 macrophages infection by LF82-GFP at a MOI of 30. Representative images at 1 h  
797 and 24 h. Scale bar is 5  $\mu$ m B) Imaging of LF82-mCherry stress responses at the single  
798 cell level with biosensors. Imaging was performed at 24 h P.I.. LF82-mCherry was  
799 transformed with plasmids containing either the *katG* promoter fused to GFP (*PkatG*-  
800 GFP), the *mgtC* promoter (*PmgtC*-GFP), the *asr* promoter (*Pasr*-GFP) or the *sula*  
801 promoter (*Psula*-GFP). C) Imaging of LF82-mCherry *Pasr*GFP and Lamp1 phagolysosome  
802 marker E) Measure of the fluorescence intensity of individual LF82-mCherry containing  
803 the *katG* promoter fused to GFP at 1 h and 24 h P.I. F) Measure of the fluorescence  
804 intensity of individual LF82-mCherry containing the *asr* promoter fused to GFP at 1 h  
805 and 24 h P.I. G) LF82 *Psula*-GFP, LF82 *PkatG*GFP, LF82 *Pasr*-GFP in LB respectively  
806 supplemented with MMC (5 $\mu$ M), with H<sub>2</sub>O<sub>2</sub> (5 $\mu$ M) or switched to pH4.7 1h before  
807 imaging. Distribution of the fluorescence of LF82 *Pasr*-GFP after 24h post infection in  
808 macrophage (from panel B) and after 1 hours of growth in LB buffered at pH4.7.  
809 Fluorescence values were expressed as their log<sub>2</sub>ratio with the average value of the  
810 maximum decile (maximum expression). Distributions were compared with a Two-  
811 sample Kolmogorov-Smirnov (KS) test.

812

813 **Figure 3. Non-grower LF82 are produced during intracellular growth.** A) 814 Representative image of LF82 containing the fluorescent dilution plasmid (pFC6Gi) at 1 815 h and 24 h post-infection. The frequency of replicative and non-growing LF82 (undiluted 816 GFP) is indicated (N =300). B) Representative image of LF82 containing the TIMER 817 plasmid (pBR-TIMER) at 18 h post-infection. The red arrows points toward the reddest 818 LF82. The frequency of replicative and non-growing LF82 is indicated (N =300). C) 819 Representative images of LF82-mCherry FtsZ-GFP at 1 h and 24 h post-infection. 820 Infections presented in panels A to C were performed with a stationary phase culture of 821 LF82 (O.D. 2). Scale bars are 5  $\mu$ m. D) Measure of the frequency of LF82 presenting a 822 FtsZ ring in populations growing in LB or within macrophages (N =300).

823 824 **Figure 4. Persisters LF82 are produced during intracellular growth.** A) Measure of 825 the proportion of LF82 that were tolerant to ciprofloxacin (10x MIC) at 1 h or 3 h. LF82 826 were cultivated up to OD 0.3 in LB medium (*in vitro*) or harvested after 1 h or 24 h post 827 infection within macrophages. The challenges exerted on bacteria passaged through 828 macrophages started immediately after macrophage lysis (see experimental 829 procedures). B) Proportion of non-growing LF82 (labeled using the Fluorescent Dilution 830 assay) observed within macrophages (24 h P.I.) following a 6 h ofloxacin treatment. C) 831 Ratio of ciprofloxacin-tolerant versus viable LF82 and K12-C600 bacteria after 832 macrophage infection. Values are averages of 5 experiments. Data were analyzed using a 833 Student's *t* test to determine differences with the proportion of ciprofloxacin-tolerant 834 LF82 at 1 h post-infection, \**P* < 0.05. D) Measure of the proportion of LF82 that were 835 tolerant to ciprofloxacin at 1 h or 3 h with increasing times after macrophage lysis. E) 836 Imaging of the regrowth properties of individual LF82-TIMER bacteria after 837 macrophages lysis. Infections were performed for 20 h and then macrophages were 838 lysed, LF82 spread on to LB agarose pads and immediately imaged at 37°C. TIMER red 839 fluorescence was progressively lost as microcolonies formed. The lysis procedure 840 requires 20 minutes before the first field can be observed (t20 min). F) Measure of the 841 ability of LF82 to form microcolonies as a function of red TIMER fluorescence at t20 min 842 of the experiment are presented in E; areas of microcolonies are expressed in pixels<sup>2</sup>;

843 844 **Figure 5. SOS and stringent responses control LF82 cell cycle in the macrophages.**

845 . A) Proportions of LF82, K12-C600 and LF82 deletion mutants that were tolerant to a  
846 3h ciprofloxacin challenge following a 1 h or 24 h intracellular period within THP1  
847 macrophages. Values represent the average of 3 to 7 experiments. Data were analyzed  
848 by using a Student's *t* test to determine differences compared with wild-type LF82. \**P* <  
849 0.05. B) Measure of the proportions of LF82 *lexA ind*, *recA*, *sulA*, *dksA*, *dksA lexAind*-,  
850 *dksA recA* mutants that were tolerant to 3 h of cefotaxim challenge after 1 h of  
851 macrophage infection. The 3 h time point was below detection limit for the *dksA recA*  
852 mutant because of the poor viability of the mutant in macrophages. Cefotaxime only kills  
853 growing bacteria; therefore we resuspended LF82 in LB after macrophage lysis. Under  
854 these conditions, we did not observe the plateau observed for persisters to  
855 ciprofloxacin, suggesting that tolerant rather than persister bacteria were measured. C)  
856 Same as in B but with 20 h of macrophage infection. Values represent the average of 3 to  
857 7 experiments. Data were analyzed using a Student's *t* test to determine differences  
858 compared with wild-type LF82. \**P* < 0.05. D) Imaging of the FD for the *relA spoT* and  
859 *recA* mutants. Imaging at 24 h P.I. at MOI 100. Data represent the % of replicative and  
860 non-growing LF82 at 18 h; a total of 300 bacteria were counted. E) Percentage of the  
861 LF82 population presenting a high, mid or low level of red TIMER fluorescence at 18 h  
862 P.I.. The *recA*, *lexAind*-, *sulA* and *dksA* mutants were tested. F) Live and dead assay  
863 performed 1 h and 18 h P.I., in the LF82, LF82*recA*, LF82*lexAind*-, LF82*sulA*,  
864 LF82*relAspoT* and LF82*dksA* strains.

865

866 **Figure 6. Kinetics of macrophage infection.** A) Model of infection of THP1  
867 macrophages by LF82, describing the processes of net growth, switch to persistence and  
868 stress-induced death as explained in the text. Part of the cells that enter the macrophage  
869 die at the onset of the infection ( $t=0$ ). During lag phase ( $0 < t < \lambda$ ), death either exactly  
870 compensates birth or, in the mutant lacking the stringent response, results in a negative  
871 net growth rate  $-\delta_1$ . Later in the infection, the net growth rate  $\beta$  is positive. Death rate  
872 due to stress accumulation (yellow bar) is negligible in the early stages of infection and  
873 becomes particularly important at late time points. Bacteria switch to a persistent state  
874 at a rate  $k_p$  independent of the growth stage. B) Experimental measures of the infection  
875 kinetics (CFUs from 5 replicate experiments, circles; persister fractions, stars) collected  
876 over 24h for LF82, *E. coli* K12-C600 and LF82 *dksA* and the best fitting parameters  
877 (Supplementary text Table 1) of model eq. (1) (Methods). Continuous lines represent

878 total number of bacteria (B+P, continuous line) and persisters (P, dotted line). Vertical  
879 lines indicate the duration  $\lambda$  of lag phase. C) Projected changes in infection dynamics for  
880 'virtual mutants' LF82\*, obtained by varying  $k_p$ ,  $\lambda$  and  $d_{max}$  – the parameters that  
881 quantitatively differ between LF82 and *E. coli* K12-C600 – around the LF82 best fit  
882 solution (black line); colored lines correspond to parameter values within the indicated  
883 interval.

884

### 885 **Figure 7: Dynamic of AIEC LF82 bacterial population during macrophage infection**

886 Upon phagocytosis both replicative (green FtsZ ring) or stationary phase (brown) LF82  
887 detect a signal, perhaps nutrient depletion, that led to stringent response activation. This  
888 activates a first phenotypic switch toward a non-replicating state (orange) that protects  
889 LF82 from dying because of initial stress burst. Among these non-replicating LF82  
890 persisters are formed. After this lag phase, a second switch is required to initiate few  
891 rounds of replication. The timing and perhaps the frequency of switching from lag phase  
892 to replicative phase differentiate LF82 from our control commensal strain. We have not  
893 yet identified LF82 specific determinants that allow this switch. Subsequent replication  
894 rounds are dependent on the DNA repair machinery. A third switch, linked to the  
895 increasing stress or lesions, is turned on in a portion of the replicative population to  
896 form new non growers and persisters. The SOS response might also be playing a role at  
897 this stage.

898

899

900

901

902 **Legend of the supplementary figures**

903

904 **Supplementary Figure S1. Measure of the impact of various stresses on LF82 and**

905 **K12-C600 growth.** A) Growth curves of LF82 and K12-C600 in LB medium at pH 7.4

906 (blue) and in the presence of serine hydroxamate (15 mg/ml), Serine hydroxamate (7

907 mg/ml), EDTA (70 mM) or in LB at pH 4.7 and LB at pH 4.7 in the presence of EDTA (70

908 mM). B) Chemicals or a pH shift were applied at 160 min. B) Same as in A with addition

909 of the antibiotics ciprofloxacin (24 ng/ml) or cefotaxim (800 ng/ml). Data are the mean

910 of 3 technical replicates.

911

912 **Supplementary Figure S2. Intracellular Live and dead assays.** A) Live and dead

913 assay performed in situ on infected macrophages or after macrophage lysis. For in situ

914 experiments a very weak propidium iodide (PI) labeling is observed on putative dead

915 LF82. By contrast strong PI labeling is observed after macrophage lysis. B) Measure of

916 the speed of disappearance after phagocytosis by macrophages of heat-killed LF82. LF82

917 were killed by 15 min incubation at 60°C and subsequently labeled with propidium

918 iodide. Labeled dead LF82 were incubated with macrophage at a MOI of 100. Imaging

919 was performed at 1h, 2h, 3h and 24h post infection. SYTO-9 was used to reveal

920 macrophage and eventual live bacteria. The number of dead LF82 per macrophage was

921 measured at each time points. Data are average of 3 experiments.

922

923 **Supplementary Figure S3. Impact of SOS mutations on survival and persistence of**

924 **LF82 strains.** A) Measure of the resistance to Mitomycin C (MMC) of LF82, LF82 *recA*,

925 LF82 *lexAind-*, MG1655, MG1655 *recA* and MG1655 *lexAind-*. B) Measure of the tolerance

926 to cefotaxim of LF82 and LF82 *recA*, LF82 *lexAind-*, LF82 *sulA* grown in LB medium to an

927 OD of 0.2. C) Induction of tolerance to cefotaxim by pretreatment with a subinhibitory

928 dose of ciprofloxacin (24 ng/ml). The data represent the ratio of the number of bacteria

929 that were tolerant to 3 h of cefotaxim in the presence or absence of ciprofloxacin.

930

931 **Supplementary Figure S4. Calibration of the fluorescent dilution assay.** A) Growth

932 curve of LF82 pFC6Gi in LB at 37°C. Colored diamonds represent the sampling times

933 analyzed by fluorescence microscopy in the panel B. B) Distribution of GFP fluorescence

934 in the growing population of LF82; GFP fluorescence is expressed as the number of

935 generations (each generation corresponds to a 2-fold decrease in GFP fluorescence  
936 compared with the average fluorescence of the fully induced population at t<sub>0</sub>). C)  
937 Distribution of GFP fluorescence in the population of LF82-infecting macrophages.  
938 Fluorescence was measured for individual bacteria or small bacterial clusters after  
939 macrophage fixation at 1 h, 6 h, 24 h and 48 h post-infection. D) Distribution of the GFP  
940 fluorescence in the population of K12-C600 bacteria infecting macrophages.  
941 Fluorescence was measured for individual bacteria or small bacterial clusters after  
942 macrophage fixation at 1 h and 24 h post-infection.

943

944 **Supplementary Figure S5. Calibration of the TIMER assay.** A) Scatter plot of green  
945 versus red TIMER fluorescence measured for exponentially growing LF82 (green) and  
946 for a culture that had reached stationary phase (red). B) Distribution of the red TIMER  
947 fluorescence (Arbitrary fluorescence Intensity, AI) measured for exponentially growing  
948 LF82 (green) and stationary phase LF82 (red) at 4 h and 18 h post-infection. Curves  
949 represent the normal fit of the data. The middle peak height for exponential and  
950 stationary cultures was used to respectively define the fast-mid and mid-slow borders of  
951 the boxes.

952

953

954

955

A

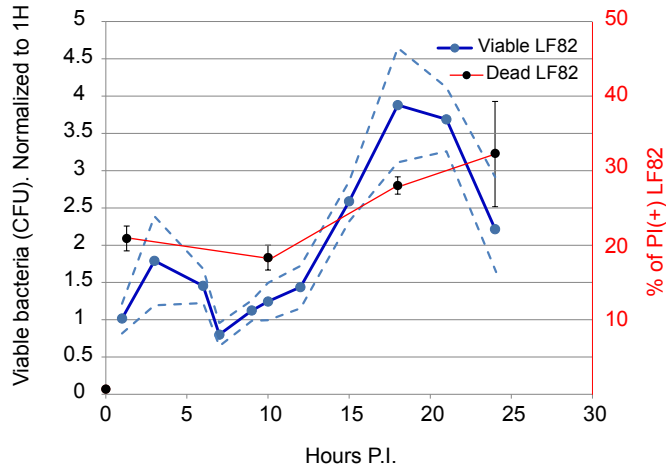

B

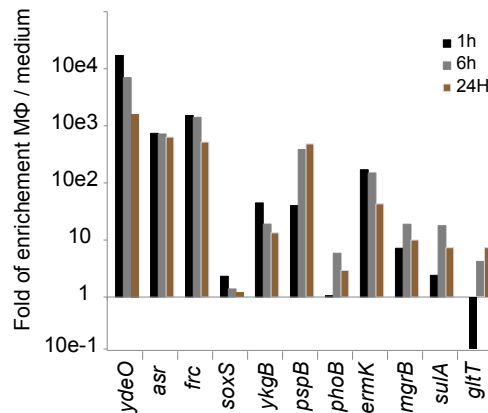

C

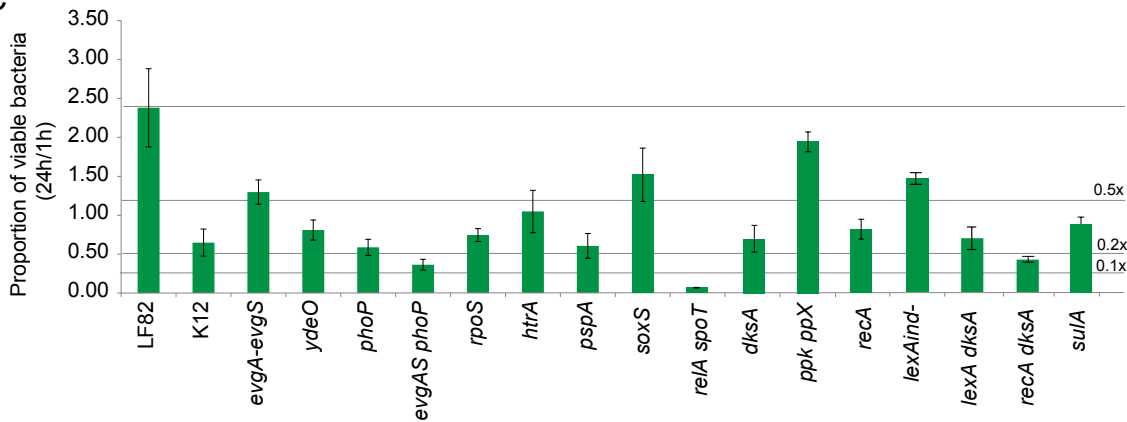



A

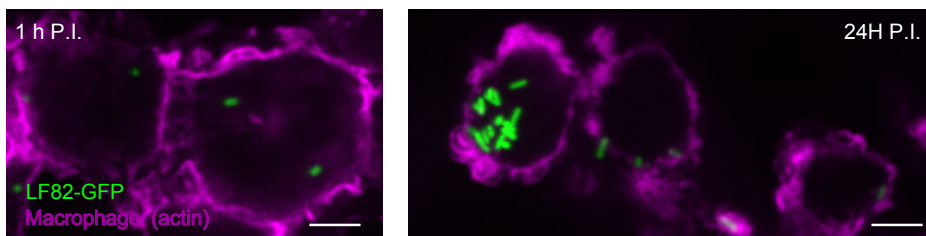

C

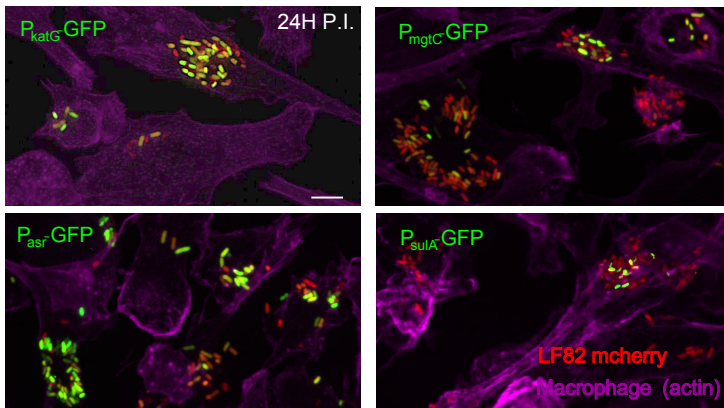

D

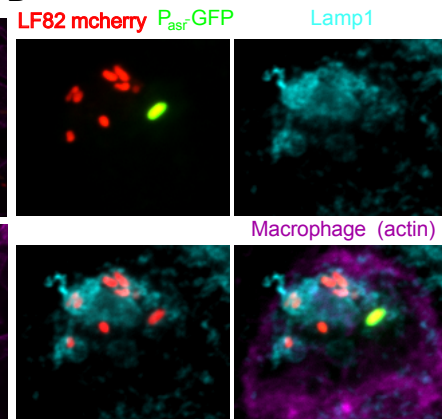

E

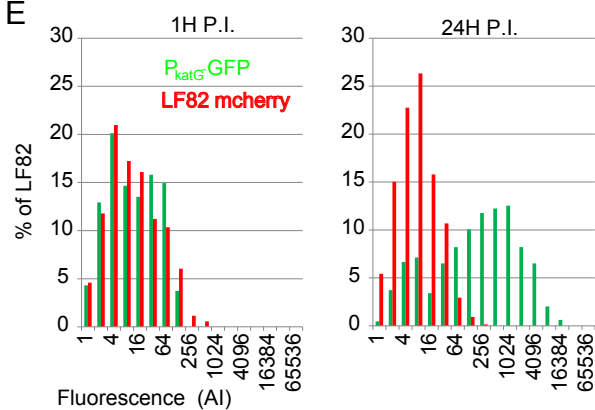

F

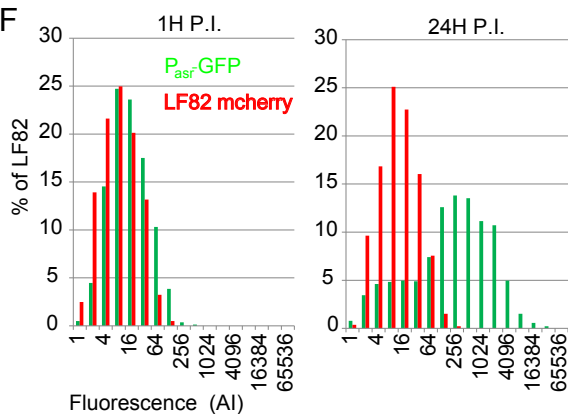

G

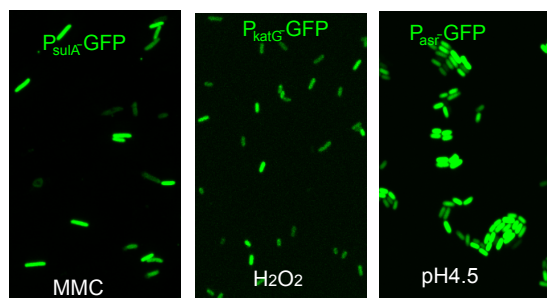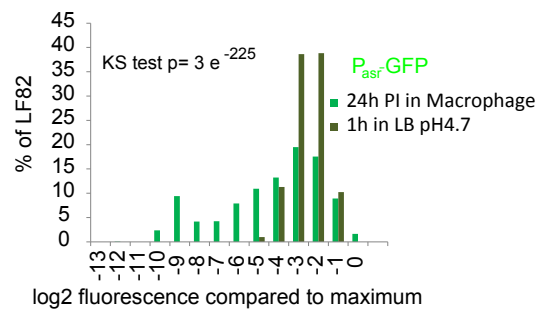



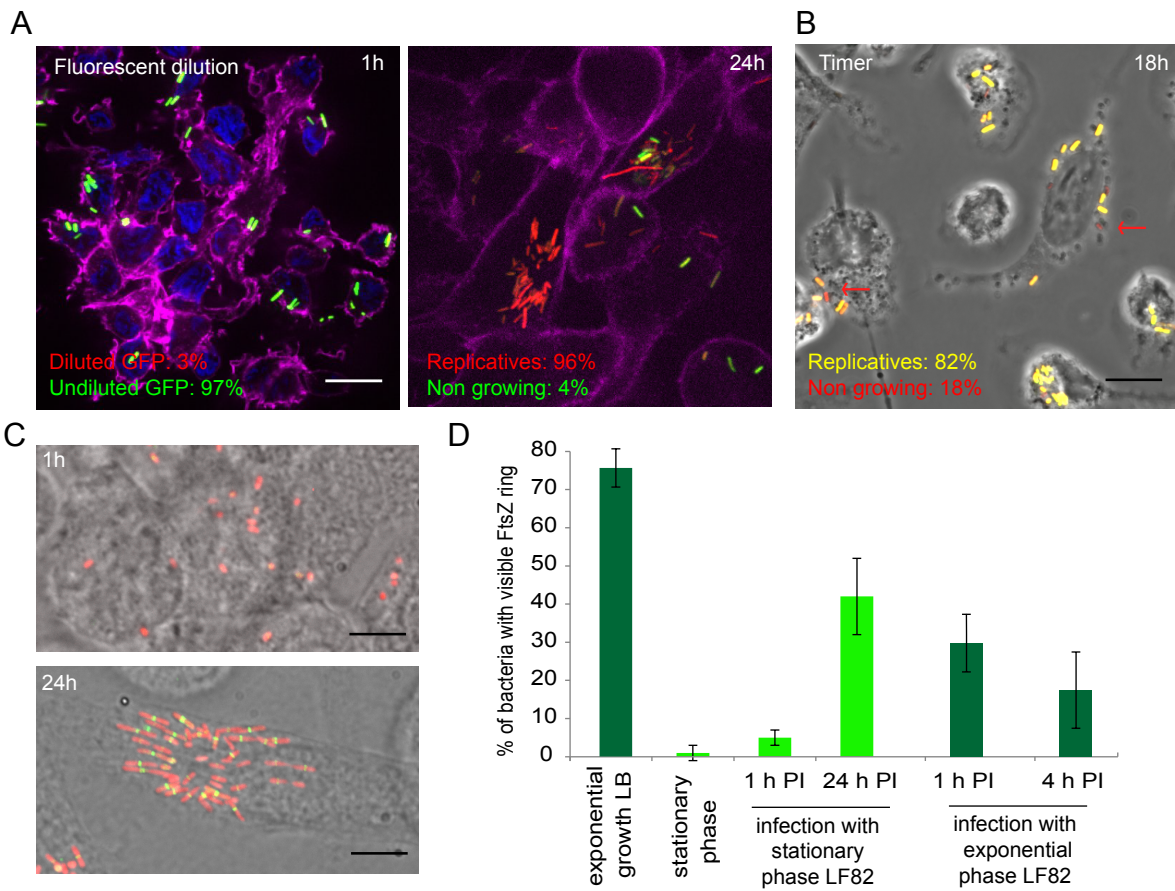

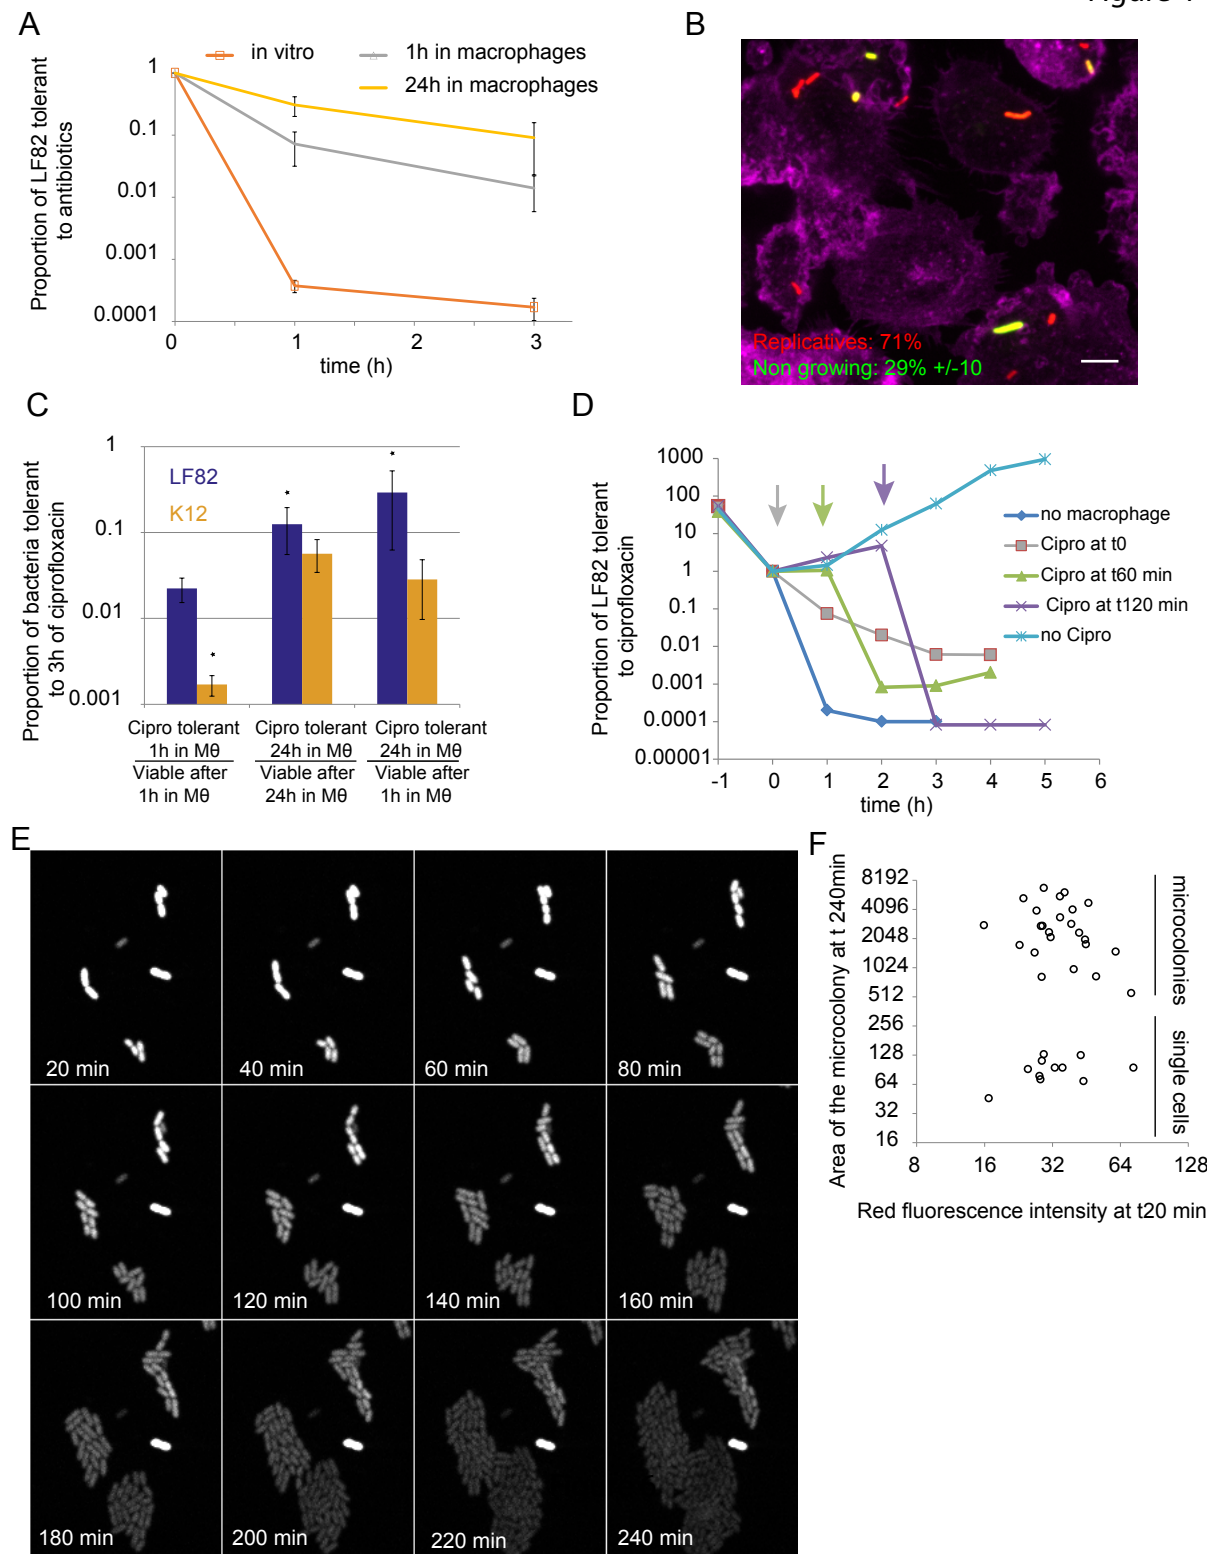

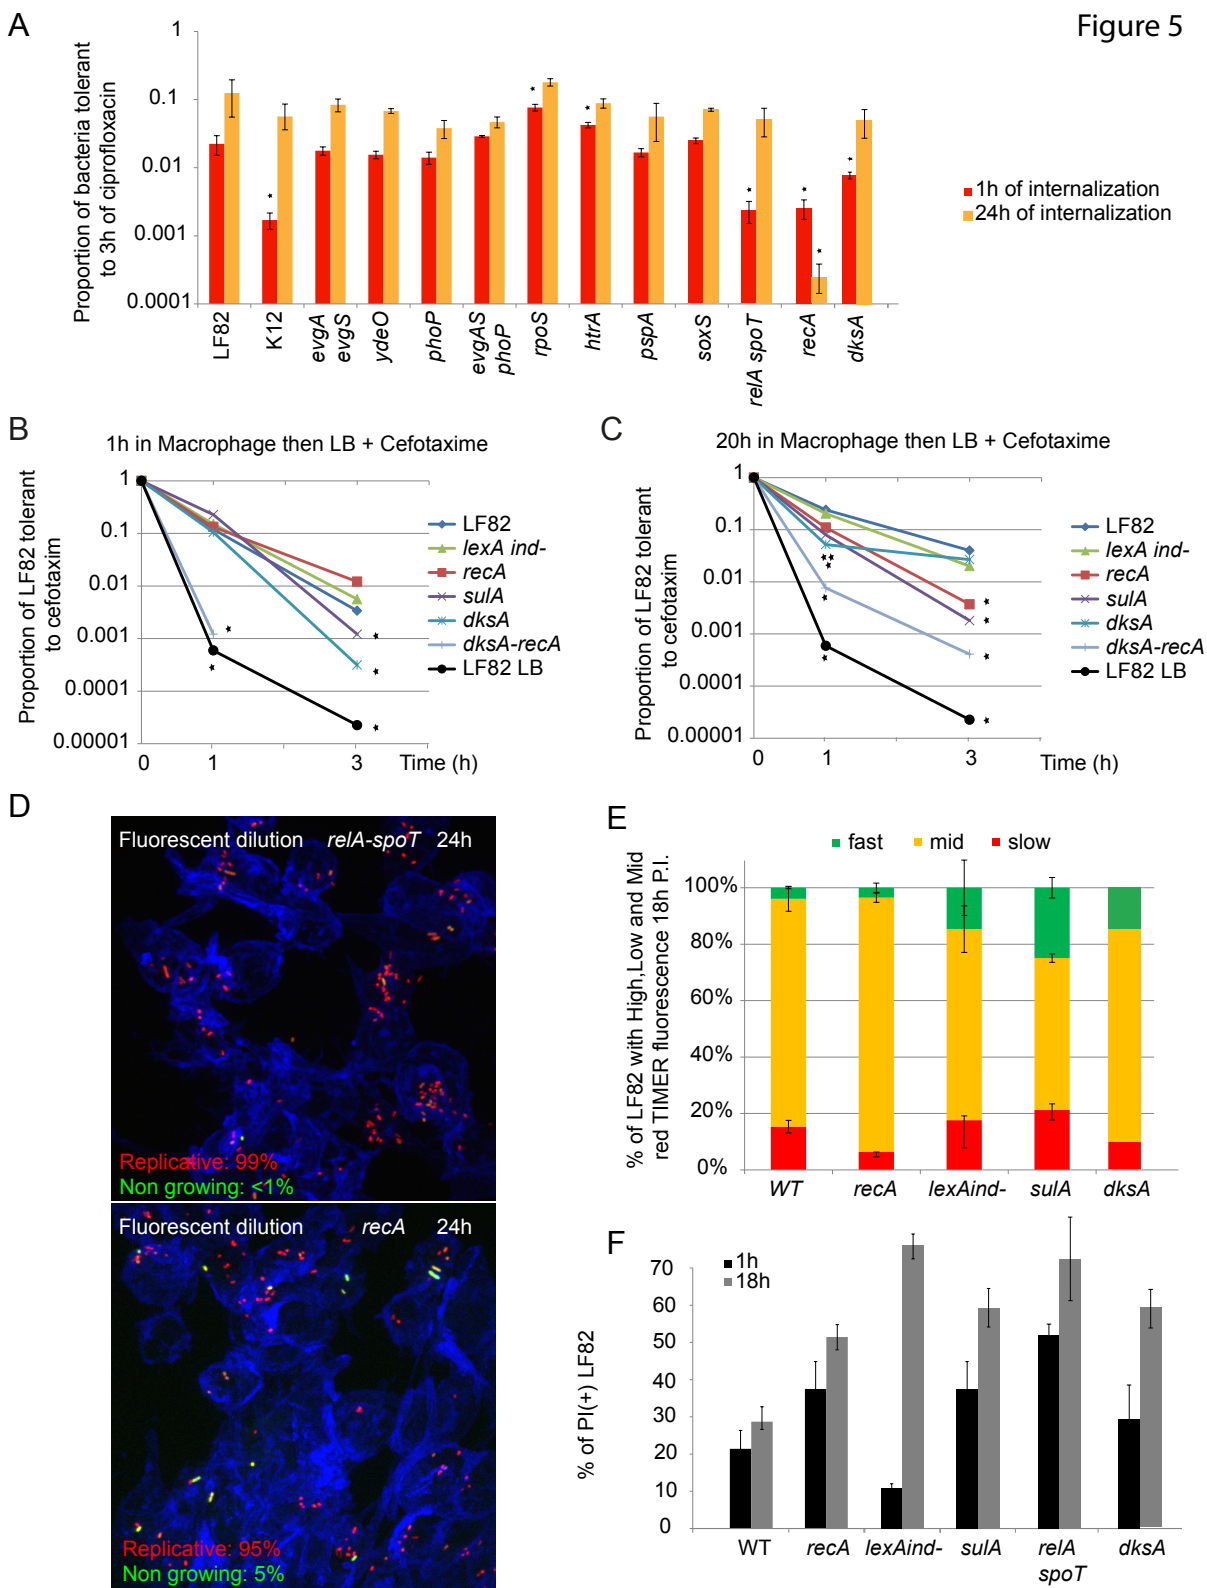

A

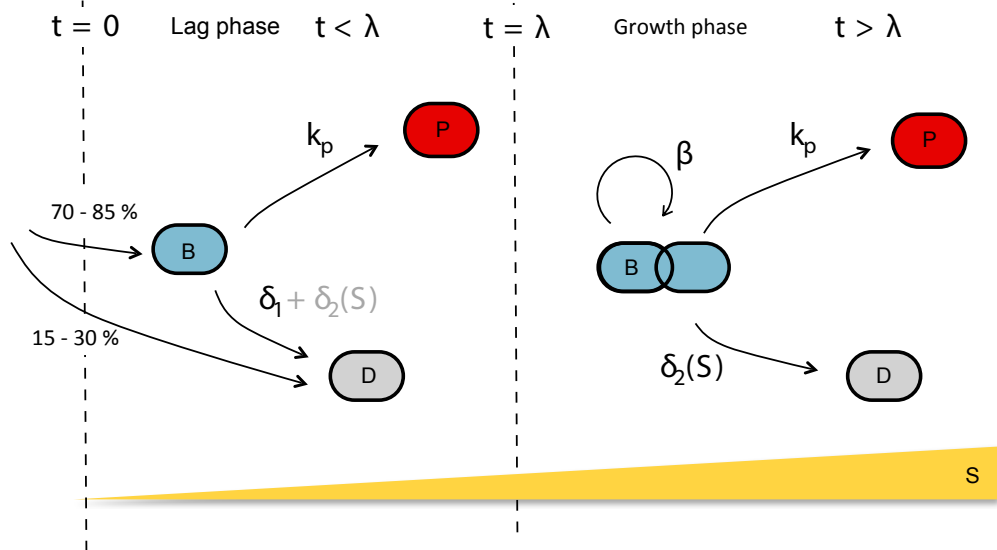

B

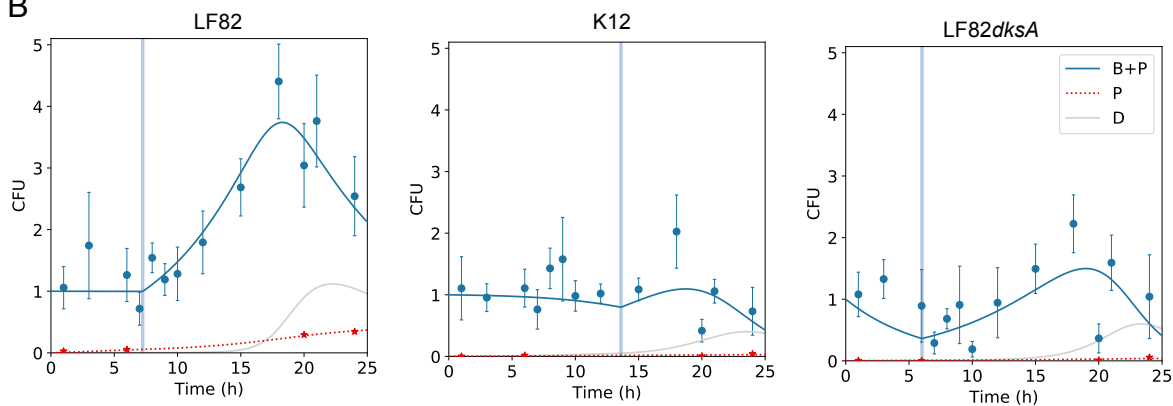

C

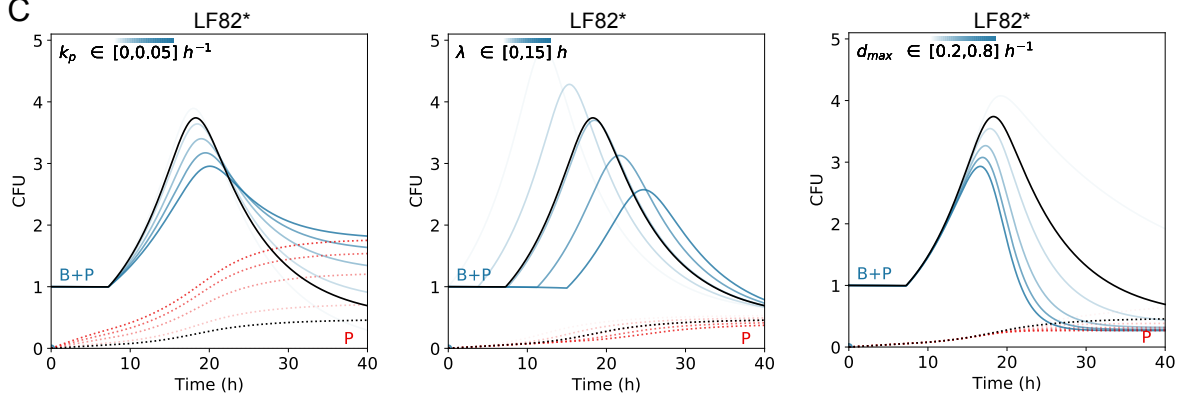

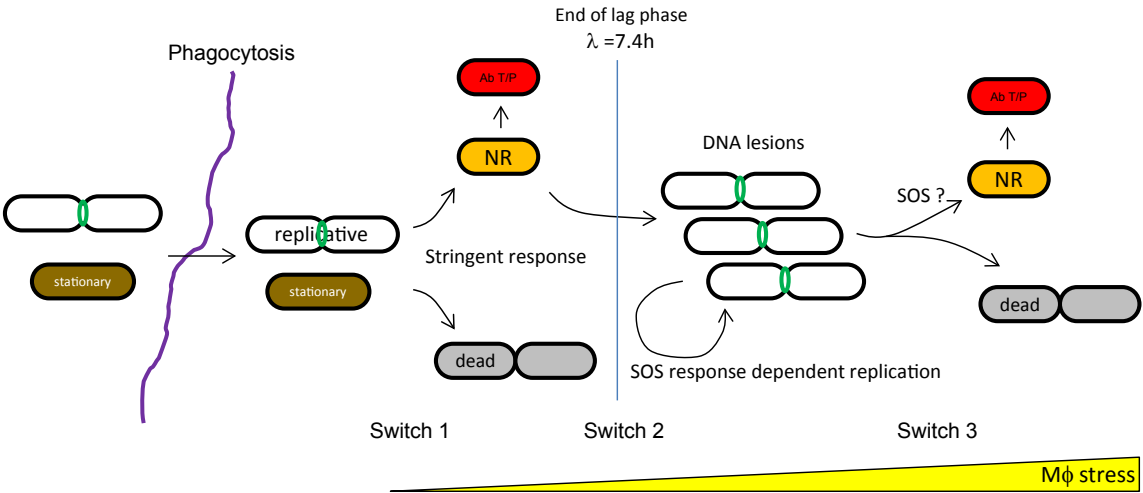

Source: https://www.biorxiv.org/content/biorxiv/early/2019/02/27/551226.full.pdf
